# Supplementary material for: Vulnerability of Global Afforestation Projects to a Polyphagous Invasive Fall Webworm
Source: Research Square preprint supplement (doi:10.21203/rs.3.rs-5939468/v1), 2025-02-13
Supplement: Supplementary file 1 [file abffc80384e210ce010d44a9.docx]

| **Table S1 Planted forest area by country** | |
| --- | --- |
| **Country** | **Planted area (1000 ha)** |
| Afghanistan | 0 |
| Andorra | 0 |
| Anguilla | 0 |
| Antigua and Barbuda | 0 |
| Area Under Dispute | 0 |
| Aruba | 0 |
| Commonwealth of the Bahamas | 0 |
| Barbados | 0 |
| Bermuda | 0 |
| Republic of Botswana | 0 |
| Cayman Islands | 0 |
| East Timor | 0 |
| Falkland Islands (Malvinas) | 0 |
| French Southern Territories | 0 |
| Gibraltar | 0 |
| Guyana | 0 |
| Republic of Honduras | 0 |
| The former Yugoslav Republic of Macedoni | 0 |
| Republic of Maldives | 0 |
| Principality of Monaco | 0 |
| Montserrat | 0 |
| Republic of Namibia | 0 |
| Republic of Nauru | 0 |
| Republic of Palau | 0 |
| Palestine | 0 |
| Prince Edward Island | 0 |
| Puerto Rico | 0 |
| State of Qatar | 0 |
| Federation of Saint Kitts and Nevis | 0 |
| Saint Pierre and Miquelon | 0 |
| Republic of San Marino | 0 |
| Kingdom of Saudi Arabia | 0 |
| Republic of Singapore | 0 |
| Svalbard and Jan Mayen | 0 |
| Kingdom of Swaziland | 0 |
| Turkmenistan | 0 |
| Turks and Caicos Islands | 0 |
| Tuvalu | 0 |
| United Arab Emirates | 0 |
| Republic of Vanuatu | 0 |
| Vatican City State | 0 |
| British Virgin Islands | 0 |
| Virgin Islands of the United States | 0 |
| Republic of Yemen | 0 |
| Netherlands Antilles | 0 |
| Republic of Kiribati | 0 |
| American Samoa | 0 |
| Pitcairn | 0 |
| Heard Island and McDonald Islands | 0 |
| Bouvet Island | 0 |
| Commonwealth of the Northern Mariana Isl | 0 |
| Antarctica | 0 |
| South Georgia and the South Sandwich Isl | 0 |
| Tokelau | 0 |
| Cocos (Keeling) Islands | 0 |
| Western Sahara | 0 |
| Democratic Republic of Sao Tome and Prin | 0 |
| Saubt Helena | 0 |
| Kingdom of Spain | 0 |
| Christmas Island | 0 |
| British Indian Ocean Territory | 0 |
| Greenland | 0.22 |
| Sultanate of Oman | 0.5 |
| Central African Republic | 2 |
| Somalia Republic | 3 |
| Mongolia | 7.68 |
| Republic of Djibouti | 0.2 |
| French Guiana | 0.8 |
| Republic of Chad | 19.8 |
| Democratic Republic of Congo | 57.7 |
| Republic of Guinea-Bissau | 1.05 |
| Lebanese Republic | 0.35 |
| Niue | 0.01 |
| Islamic Republic of Mauritania | 43.57 |
| Republic of Cote d’Ivoire | 13.95 |
| Arab Republic of Egypt | 44.98 |
| United States of Mexico | 100.38 |
| Republic of Bolivia | 62.6 |
| Faroe Islands | 0.08 |
| Republic of the Sudan | 130 |
| Republic of Zambia | 52.09 |
| Republic of Suriname | 14.15 |
| Republic of Mozambique | 74.27 |
| Republic of Niger | 122.5 |
| Belize | 2.39 |
| Gabonese Republic | 30 |
| Comoros | 0.21 |
| Great Socialist People | 217 |
| Republic of Malta | 0.04 |
| Republic of Cameroon | 61.1 |
| Independent State of Papua New Guinea | 60.75 |
| Republic of Kazakhstan | 420.77 |
| Republic of the Gambia | 1.78 |
| Republic of Senegal | 32 |
| Republic of Congo | 59.5 |
| Republic of Benin | 23 |
| Republic of Iraq | 89.79 |
| ALGERIA | 510 |
| Republic of Guinea | 57 |
| Federal Republic of Nigeria | 216.27 |
| Republic of Liberia | 27.03 |
| Republic of Kenya | 152.79 |
| Republic of Zimbabwe | 108 |
| Kingdom of Norway | 108 |
| Kingdom of Lesotho | 8.67 |
| Islamic Republic of Pakistan | 253.9 |
| SOUTH SUDAN | 187.9 |
| Republic of Sierra Leone | 21.3 |
| Guadeloupe | 0.5 |
| Commonwealth of Australia | 2390.3 |
| State of Kuwait | 6.25 |
| French Polynesia | 9.46 |
| State of Eritrea | 43.4 |
| Republic of Colombia | 427.4 |
| Republic of Paraguay | 155.66 |
| Republic of Iceland | 39.56 |
| Republic of Ecuador | 111.01 |
| Republic of Mali | 568 |
| Republic of Nicaragua | 66.26 |
| Argentina | 1436 |
| Hashemite Kingdom of Jordan | 46.9 |
| Republic of Madagascar | 312 |
| Kingdom of Bhutan | 20.82 |
| New Caledonia | 10.39 |
| Reoublic of Montenegro | 8 |
| United Republic of Tanzania | 553.04 |
| Islamic Republic of Iran | 1000.89 |
| Grenada | 0.21 |
| Republic of Armenia | 18.47 |
| Union of Myanmar | 427.09 |
| Republic of Malawi | 75.7 |
| Burkina Faso | 177.1 |
| Angola | 807.2 |
| Jamaica | 8.38 |
| Saint Vincent and the Grenadines | 0.3 |
| Republic of Tajikistan | 117.41 |
| Republic of El Salvador | 17.61 |
| Solomon Islands | 24.27 |
| Republic of Peru | 1088.47 |
| Republic of Panama | 65.74 |
| Brunei Darussalam | 5.26 |
| Republic of Turkey | 717.34 |
| State of Bahrain | 0.7 |
| Georgia | 71.97 |
| Hellenic Republic | 138.9 |
| Republic of Togo | 60.7 |
| Commonwealth of Dominica | 0.81 |
| Federal Democratic Republic of Ethiopia | 1203.3 |
| Russian Federation | 18880.1 |
| BANGLADESH | 158.07 |
| Syrian Arab Republic | 211.4 |
| Kyrgyz　Republic | 228.71 |
| Republic of Haiti | 32 |
| Republic of Croatia | 68.59 |
| Republic of Ghana | 297.1 |
| Republic of Philippines | 380.52 |
| Republic of Tunisia | 214.48 |
| Federative Republic of Brazil | 11233.6 |
| Kingdom of Tonga | 1 |
| Norfolk Island | 0.05 |
| Republic of Guatemala | 151.92 |
| Kingdom of Morocco | 634.6 |
| Republic of Venezuela | 1358.15 |
| Republic of Serbia | 115.83 |
| Kingdom of Nepal | 220.6 |
| Mayotte | 0.56 |
| Republic of Costa Rica | 86.6 |
| Independent State of Samoa | 5.04 |
| Canada | 18163.39 |
| Republic of Uganda | 465.16 |
| Italian Republic | 644.99 |
| Republic of Slovenia | 45.69 |
| Bosnia and Herzegovina | 119.31 |
| Republic of Indonesia | 4525.7 |
| Martinique | 2.7 |
| Albania | 70.39 |
| Republic of South Africa | 3143.62 |
| Republic of South Africa | 3143.62 |
| United States Of America | 27521 |
| Wallis and Futuna | 0.63 |
| Kingdom of Cambodia | 603.97 |
| Republic of Azerbaijan | 305.57 |
| Republic of Cyprus | 32.75 |
| Switzerland | 148.95 |
| Principality of Liechtenstein | 0.6 |
| Romania | 895.07 |
| Democratic Socialist Republic of Sri Lan | 249.81 |
| State of Israel | 85 |
| Dominican Republic | 190.01 |
| India | 13269 |
| Republic of Burundi | 112.97 |
| Republic of Chile | 3184.7 |
| Reunion | 10.7 |
| France Republic | 2434 |
| Republic of Equatorial Guinea | 125 |
| Cook Islands | 1.1 |
| Estonia | 215.74 |
| Republic of Cuba | 532.66 |
| Republic of Uzbekistan | 2266.68 |
| Malaysia | 1697.12 |
| Republic of Rwanda | 150 |
| Saint Lucia | 3.15 |
| Republic of Moldova | 218.8 |
| Oriental Republic of Uruguay | 1182 |
| Kingdom of Thailand | 3537 |
| Republic of Bulgaria | 777 |
| Republic of Latvia | 465.44 |
| Lao People | 1771.25 |
| New Zealand | 2084.48 |
| Republic of Cape Verde | 32.04 |
| Kingdom of the Netherlands | 331.58 |
| Ukraine | 4848 |
| North Korea | 987.34 |
| Republic of Hungary | 788.78 |
| Republic of Mauritius | 17.95 |
| Peoples Republic of China | 84696.3 |
| Republic of Lithuania | 611 |
| Kingdom of Denmark | 412.04 |
| Ireland | 674.22 |
| Repubic of Belarus | 2212 |
| Republic of Seychelles | 4.9 |
| United Kingdom of Great Britain and Nort | 2846 |
| Republic of Fiji Islands | 206.88 |
| Grand Duchy of Luxembourg | 30 |
| Socialist Republic of Viet Nam | 4349.37 |
| Kingdom of Belgium | 438.2 |
| Slovakia Republic | 748.54 |
| Republic of Trinidad and Tobago | 80.7 |
| Federal Republic of Germany | 5709.5 |
| Republic of the Marshall Islands | 3.13 |
| Republic of Austria | 1671.5 |
| Federated States of Micronesia | 14.21 |
| Republic of Finland | 7368.08 |
| Republic of Korea | 2263.32 |
| Republic of Poland | 7366 |
| Portuguess Republic | 2256 |
| Japan | 10184 |
| Kingdom of Sweden | 13912 |
| Czech Republic | 2539.43 |
| *data from Global Forest Resources Assessments Country Reports 2020 | |

| **Table S2 Percentage of Planted Forest Area in Key Administrative Regions Affected by the Fall Webworm** | | | | |
| --- | --- | --- | --- | --- |
| Country | primary administrative division | Afforestation area (Mha) | Administrative area (Mha) | Percentage |
| Greece | North Aegean | 0.042 | 0.3836 | 0.10948905 |
| Germany | Hessen | 0.43 | 2.111 | 0.20369493 |
| Japan | Kochi | 0.463531 | 0.7103 | 0.65258482 |
| Japan | Ehime | 0.34155 | 0.5676 | 0.60174419 |
| China | Hainan | 2.10117 | 3.5177 | 0.59731359 |
| China | Fujian | 6.960668 | 12.3951 | 0.5615661 |
| Poland | Lubuskie | 0.718 | 1.3985 | 0.51340722 |
| China | Guangdong | 8.97233 | 17.9656 | 0.49941722 |
| Japan | Miyazaki | 0.365539 | 0.7735 | 0.47257789 |
| Japan | Nara | 0.17162 | 0.369 | 0.46509485 |
| Japan | Oita | 0.293206 | 0.634 | 0.46247003 |
| China | Guangxi | 10.801174 | 23.7606 | 0.45458339 |
| Japan | Wakayama | 0.212898 | 0.4724 | 0.45067316 |
| Japan | Kumamoto | 0.332522 | 0.7409 | 0.44880821 |
| Slovenia | Koroška | 0.0449 | 0.1041 | 0.43131604 |
| China | Jiangxi | 7.13274 | 16.6936 | 0.42727393 |
| Japan | Tokushima | 0.17674 | 0.4146 | 0.4262904 |
| China | Zhejiang | 4.44135 | 10.5506 | 0.4209571 |
| Bulgaria | Smolyan | 0.124 | 0.31928 | 0.38837384 |
| Japan | Shizuoka | 0.299346 | 0.7777 | 0.38491192 |
| Japan | Mie | 0.219605 | 0.5774 | 0.38033426 |
| Japan | Akita | 0.428655 | 1.1637 | 0.36835525 |
| South Korea | Daejeon | 0.019846 | 0.053985 | 0.36762064 |
| China | Chongqing | 3.010065 | 8.2374 | 0.36541445 |
| Montenegro | Tivat | 0.00168 | 0.0046 | 0.36521739 |
| Czech Republic | Karlovarský | 0.12 | 0.331446 | 0.36204993 |
| China | Hunan | 7.630447 | 21.1836 | 0.36020539 |
| Japan | Gifu | 0.37145 | 1.0621 | 0.34973166 |
| Greece | Athos | 0.0116 | 0.0336 | 0.3452381 |
| Poland | Pomorskie | 0.622001 | 1.8323 | 0.33946461 |
| Croatia | Dubrovacko-Neretvanska | 0.057 | 0.1782 | 0.31986532 |
| Japan | Iwate | 0.484009 | 1.5275 | 0.3168635 |
| Czech Republic | Plzeňský | 0.24 | 0.7649 | 0.31376651 |
| Japan | Tottori | 0.108013 | 0.3507 | 0.30799259 |
| Czech Republic | Jihočeský | 0.306 | 1.0056 | 0.30429594 |
| Czech Republic | Liberecký | 0.0947 | 0.3163 | 0.2993993 |
| Japan | Yamanashi | 0.131842 | 0.4465 | 0.29527884 |
| Japan | Aomori | 0.27775 | 0.9646 | 0.28794319 |
| Japan | Fukuoka | 0.143559 | 0.4986 | 0.28792419 |
| North Korea | Kaesŏng | 0.012502 | 0.0442 | 0.28285068 |
| Japan | Saga | 0.068924 | 0.244 | 0.28247541 |
| Japan | Kyoto | 0.129688 | 0.4612 | 0.28119688 |
| Japan | Kagoshima | 0.25385 | 0.9186 | 0.27634444 |
| Turkey | Mugla | 0.347098 | 1.2654 | 0.27429904 |
| Turkey | Bolu | 0.227 | 0.8313 | 0.27306628 |
| Japan | Fukushima | 0.376212 | 1.3784 | 0.27293384 |
| Poland | Świętokrzyskie | 0.316 | 1.1672 | 0.27073338 |
| America | Georgia | 4.14 | 15.391 | 0.26898837 |
| America | Alabama | 3.585203 | 13.5767 | 0.26407028 |
| Belgium | Limburg | 0.064 | 0.2427 | 0.26370004 |
| Japan | Hyōgo | 0.219674 | 0.84 | 0.26151667 |
| Romania | Suceava | 0.223 | 0.8553 | 0.26072723 |
| Japan | Nagano | 0.352922 | 1.3561 | 0.26024777 |
| Ukraine | Kyiv | 0.0216 | 0.0839 | 0.25744934 |
| China | Anhui | 3.57743 | 14.014 | 0.25527544 |
| Ukraine | Rivne | 0.51 | 2.0047 | 0.25440215 |
| America | South Carolina | 2.09575 | 8.2933 | 0.25270399 |
| Montenegro | Rožaje | 0.0109 | 0.0432 | 0.25231481 |
| Turkey | Kastamonu | 0.329 | 1.3064 | 0.25183711 |
| Japan | Yamaguchi | 0.153397 | 0.6112 | 0.25097677 |
| Japan | Aichi | 0.129339 | 0.5172 | 0.25007541 |
| Slovakia | Žilinský | 0.17 | 0.680858 | 0.24968496 |
| Belgium | Liège | 0.0954 | 0.3857 | 0.24734249 |
| Germany | Berlin | 0.0219 | 0.08913 | 0.24570852 |
| Austria | Kärnten | 0.233 | 0.953597 | 0.24433802 |
| Montenegro | Podgorica | 0.002613 | 0.0108 | 0.24194444 |
| Austria | Steiermark | 0.391 | 1.6401 | 0.2384001 |
| Czech Republic | Kraj Vysočina | 0.16 | 0.6795 | 0.23546726 |
| Poland | Mazowieckie | 0.832 | 3.5579 | 0.23384581 |
| Japan | Gunma | 0.148551 | 0.6362 | 0.23349733 |
| Germany | Sachsen | 0.43 | 1.842 | 0.23344191 |
| Japan | Fukui | 0.097248 | 0.419 | 0.23209547 |
| Japan | Tochigi | 0.147532 | 0.6408 | 0.23023096 |
| China | Hubei | 4.264711 | 18.5937 | 0.22936323 |
| Belarus | Homyel' | 0.922 | 4.036166 | 0.22843461 |
| North Korea | Kangwŏn-do | 0.257034 | 1.1255 | 0.22837317 |
| Bulgaria | Pazardzhik | 0.101 | 0.44569 | 0.22661491 |
| Japan | Okayama | 0.161006 | 0.7114 | 0.22632274 |
| Japan | Shimane | 0.150009 | 0.6708 | 0.22362701 |
| Romania | Harghita | 0.148 | 0.6639 | 0.22292514 |
| Belgium | Antwerpen | 0.064 | 0.2876 | 0.22253129 |
| Serbia | Grad Beograd | 0.008657 | 0.038912 | 0.22247636 |
| Japan | Miyagi | 0.160601 | 0.7282 | 0.22054518 |
| Belgium | Flemish Brabant | 0.0241 | 0.1097 | 0.21969006 |
| Belgium | Brussels |  |  | 0.21969006 |
| Japan | Hiroshima | 0.186004 | 0.8479 | 0.21937021 |
| Poland | Podkarpackie | 0.391 | 1.7844 | 0.21912127 |
| Poland | Kujawsko-Pomorskie | 0.392 | 1.7969 | 0.21815349 |
| Poland | Opolskie | 0.204 | 0.9412 | 0.21674458 |
| Ukraine | Volyn | 0.433 | 2.0144 | 0.21495234 |
| Belarus | Minsk Oblast | 0.847 | 3.991235 | 0.21221502 |
| Germany | Rheinland-Pfalz | 0.421 | 1.9858 | 0.21200524 |
| Belarus | Mahilyow | 0.616 | 2.907901 | 0.21183665 |
| Germany | Thüringen | 0.341 | 1.6171 | 0.21087131 |
| Austria | Oberösterreich | 0.252 | 1.1982 | 0.21031547 |
| Lithuania | Alytaus | 0.114 | 0.5425 | 0.21013825 |
| Japan | Ishikawa | 0.087014 | 0.4186 | 0.20786909 |
| Slovenia | Gorenjska | 0.0442 | 0.2137 | 0.20683201 |
| Ukraine | Chernihiv | 0.658005 | 3.1865 | 0.20649772 |
| China | Beijing | 0.337997 | 1.6406 | 0.20602036 |
| Japan | Yamagata | 0.191386 | 0.9323 | 0.20528371 |
| Poland | Śląskie | 0.249 | 1.2294 | 0.20253782 |
| Poland | Dolnośląskie | 0.401 | 1.9946 | 0.20104282 |
| Estonia | Põlva | 0.0364 | 0.1823 | 0.19967087 |
| Lithuania | Vilniaus | 0.194 | 0.9729 | 0.19940384 |
| Japan | Shiga | 0.079351 | 0.4017 | 0.19753796 |
| Czech Republic | Pardubický | 0.0892 | 0.4519 | 0.1973888 |
| Germany | Niedersachsen | 0.94 | 4.762422 | 0.19737856 |
| Bulgaria | Blagoevgrad | 0.127 | 0.644947 | 0.19691541 |
| Turkey | Çanakkale | 0.193002 | 0.9817 | 0.19659978 |
| Ukraine | Sumy | 0.467 | 2.3834 | 0.19593858 |
| Ukraine | Zhytomyr | 0.583 | 2.9832 | 0.19542773 |
| Switzerland | Lucerne | 0.0289 | 0.149351 | 0.19350389 |
| Germany | Nordrhein-Westfalen | 0.659002 | 3.4098 | 0.19326705 |
| Montenegro | Pljevlja | 0.026 | 0.1346 | 0.19316493 |
| Belgium | Namur | 0.0709 | 0.3675 | 0.19292517 |
| Germany | Mecklenburg-Vorpommern | 0.446 | 2.33 | 0.19141631 |
| Greece | Epirus | 0.17 | 0.9203 | 0.18472237 |
| Switzerland | Zug | 0.00441 | 0.0239 | 0.18451883 |
| Greece | Central Greece | 0.281 | 1.555 | 0.1807074 |
| Austria | Niederösterreich | 0.344 | 1.9186 | 0.1792974 |
| Czech Republic | Zlínský | 0.0707 | 0.3964 | 0.1783552 |
| Czech Republic | Zlínský | 0.0707 | 0.3964 | 0.1783552 |
| Germany | Sachsen-Anhalt | 0.364 | 2.0446 | 0.17802993 |
| Belarus | Hrodna | 0.442 | 2.511807 | 0.17596893 |
| Romania | Neamț | 0.102 | 0.5896 | 0.17299864 |
| Slovenia | Savinjska | 0.0397 | 0.2301 | 0.17253368 |
| Estonia | Valga | 0.0326 | 0.1917 | 0.17005738 |
| Germany | Hamburg | 0.0127 | 0.075522 | 0.16816292 |
| Ukraine | Kiev | 0.472004 | 2.8131 | 0.16778785 |
| Slovenia | Notranjsko-kraška | 0.0244 | 0.1456 | 0.16758242 |
| Czech Republic | Středočeský | 0.184 | 1.1014 | 0.16706011 |
| America | Mississippi | 2.094 | 12.5438 | 0.16693506 |
| Turkey | Karabük | 0.0689 | 0.4142 | 0.16634476 |
| Poland | Podlaskie | 0.335 | 2.018 | 0.16600595 |
| Turkey | Kütahya | 0.192 | 1.1634 | 0.16503352 |
| America | Louisiana | 2.2251 | 13.5659 | 0.16402155 |
| South Korea | Chungcheongbuk-do | 0.120876 | 0.7433 | 0.16262075 |
| Poland | Lubelskie | 0.401 | 2.5155 | 0.15941165 |
| Switzerland | Neuchâtel | 0.0127 | 0.080224 | 0.15830674 |
| Greece | Ionian Islands | 0.0365 | 0.2307 | 0.15821413 |
| China | Sichuan | 7.690779 | 48.6116 | 0.15820872 |
| Japan | Kanagawa | 0.038075 | 0.2415 | 0.15766046 |
| Belarus | Vitsyebsk | 0.624 | 4.004999 | 0.15580528 |
| Denmark | Midtjylland | 0.202 | 1.3053 | 0.1547537 |
| Germany | Bremen | 0.00503 | 0.032542 | 0.15456948 |
| Turkey | Sinop | 0.087806 | 0.5717 | 0.15358755 |
| Czech Republic | Moravskoslezský | 0.0827 | 0.5445 | 0.15188246 |
| Turkey | Izmir | 0.179003 | 1.1811 | 0.15155618 |
| Estonia | Ida-Viru | 0.0449 | 0.2972 | 0.15107672 |
| Czech Republic | Olomoucký | 0.0795 | 0.526657 | 0.15095214 |
| South Korea | Gangwon-do | 0.2527 | 1.6875 | 0.14974815 |
| Czech Republic | Královéhradecký | 0.086 | 0.5768 | 0.14909847 |
| Montenegro | Herceg Novi | 0.0035 | 0.0235 | 0.14893617 |
| Japan | Saitama | 0.056423 | 0.3797 | 0.14859889 |
| Croatia | Primorsko-Goranska | 0.0531 | 0.359 | 0.14791086 |
| Japan | Ibaraki | 0.090071 | 0.6091 | 0.14787555 |
| Turkey | Balikesir | 0.214016 | 1.4583 | 0.14675718 |
| Romania | Vâlcea | 0.0846 | 0.5765 | 0.14674761 |
| Slovakia | Bratislavský | 0.0298 | 0.2053 | 0.14515343 |
| Switzerland | Zürich | 0.025 | 0.172895 | 0.14459643 |
| Switzerland | Thurgau | 0.0142 | 0.0991 | 0.14328961 |
| Ukraine | Ivano-Frankivs'k | 0.198 | 1.3928 | 0.14215968 |
| Denmark | Nordjylland | 0.114 | 0.802 | 0.14214464 |
| Belarus | Minsk | 0.0276 | 0.1943 | 0.14204838 |
| Germany | Saarland | 0.0363 | 0.257 | 0.14124514 |
| Switzerland | Aargau | 0.0198 | 0.140376 | 0.14104975 |
| Denmark | Hovedstaden | 0.0361 | 0.256829 | 0.14056045 |
| Japan | Tokyo | 0.03077 | 0.219 | 0.14050228 |
| Switzerland | Appenzell Ausserrhoden | 0.00339 | 0.024284 | 0.13959809 |
| South Korea | Chungcheongnam-do | 0.114802 | 0.822614 | 0.13955756 |
| Ukraine | Kharkiv | 0.437053 | 3.1415 | 0.13912239 |
| France | Grand Est | 0.799 | 5.7433 | 0.13911863 |
| Bulgaria | Kardzhali | 0.0444 | 0.3209 | 0.13836086 |
| North Korea | Hwanghae-namdo | 0.116076 | 0.845 | 0.13736805 |
| South Korea | Sejong | 0.006363 | 0.046523 | 0.13677106 |
| China | Shanxi | 2.13317 | 15.6698 | 0.13613256 |
| Japan | Niigata | 0.169569 | 1.2583 | 0.13476039 |
| South Korea | Gyeonggi-do | 0.13706 | 1.0184 | 0.13458366 |
| Czech Republic | Ústecký | 0.0714 | 0.5335 | 0.13383318 |
| Estonia | Võru | 0.037 | 0.2773 | 0.1334295 |
| Montenegro | Ulcinj | 0.0034 | 0.0255 | 0.13333333 |
| Macedonia | Dojran | 0.000572 | 0.00431 | 0.13271462 |
| Macedonia | Pehčevo | 0.00274 | 0.0207 | 0.13236715 |
| South Korea | Jeollabuk-do | 0.106303 | 0.806905 | 0.13174165 |
| Austria | Burgenland | 0.0521 | 0.3962 | 0.13149924 |
| North Korea | Hwanghae-bukto | 0.107119 | 0.8154 | 0.13136988 |
| Belarus | Brest | 0.43 | 3.279068 | 0.13113482 |
| Japan | Osaka | 0.024475 | 0.1905 | 0.12847769 |
| Japan | Naoasaki | 0.053038 | 0.4132 | 0.12835915 |
| Romania | Argeș | 0.0876 | 0.6826 | 0.12833285 |
| America | North Carolina | 1.785821 | 13.9391 | 0.12811595 |
| Turkey | Bilecik | 0.0535 | 0.4179 | 0.12802106 |
| Estonia | Hiiu | 0.0132 | 0.1032 | 0.12790698 |
| China | Guizhou | 2.210143 | 17.6099 | 0.12550571 |
| Turkey | Bursa | 0.134037 | 1.0813 | 0.12395912 |
| Macedonia | Centar | 0.000092 | 0.000752 | 0.12234043 |
| Turkey | Artvin | 0.0901 | 0.7393 | 0.12187204 |
| China | Henan | 2.012639 | 16.5664 | 0.12148922 |
| Ukraine | Luhans'k | 0.32207 | 2.6684 | 0.1206978 |
| Slovenia | Osrednjeslovenska | 0.0259 | 0.217 | 0.11935484 |
| Germany | Schleswig-Holstein | 0.185 | 1.5763 | 0.11736345 |
| Turkey | Antalya | 0.236016 | 2.0177 | 0.11697279 |
| Slovenia | Podravska | 0.0253 | 0.217 | 0.11658986 |
| France | Auvergne-Rhône-Alpes | 0.811026 | 6.9711 | 0.11634118 |
| Bulgaria | Kyustendil | 0.0358 | 0.3084 | 0.11608301 |
| Japan | Chiba | 0.059741 | 0.5157 | 0.11584448 |
| Lithuania | Utenos | 0.0833 | 0.7201 | 0.11567838 |
| Japan | Toyama | 0.048957 | 0.4247 | 0.11527431 |
| Hungary | Szabolcs-Szatmár-Bereg | 0.068001 | 0.593583 | 0.11456022 |
| Ukraine | L'viv | 0.248 | 2.18237 | 0.11363793 |
| France | Bourgogne-Franche-Comté | 0.542 | 4.7783 | 0.11342946 |
| Ukraine | Cherkasy | 0.237 | 2.09 | 0.11339713 |
| United Kingdom | Scotland | 0.9 | 8.0231 | 0.11217609 |
| Slovenia | Obalno-kraška | 0.011703 | 0.1044 | 0.1120977 |
| Romania | Covasna | 0.0415 | 0.371 | 0.11185984 |
| Ukraine | Poltava | 0.321009 | 2.8748 | 0.11166307 |
| America | Arkansas | 1.532374 | 13.7732 | 0.11125766 |
| Hungary | Vas | 0.0371 | 0.333614 | 0.11120636 |
| Italy | Trentino-Alto Adige | 0.151 | 1.3607 | 0.11097229 |
| Denmark | Syddanmark | 0.134 | 1.2191 | 0.10991715 |
| Moldova | Hîncesti | 0.0161 | 0.1484 | 0.10849057 |
| Greece | Peloponnese | 0.168 | 1.5491 | 0.10845007 |
| Greece | Western Greece | 0.123 | 1.1351 | 0.1083605 |
| Turkey | Yalova | 0.008612 | 0.0798 | 0.1079198 |
| China | Shaanxi | 2.20172 | 20.5624 | 0.10707505 |
| Hungary | Bács-Kiskun | 0.089415 | 0.844481 | 0.1058816 |
| Estonia | Lääne-Viru | 0.0391 | 0.3696 | 0.10579004 |
| Macedonia | Gevgelija | 0.00334 | 0.0317 | 0.10536278 |
| Turkey | Aydin | 0.085202 | 0.8116 | 0.10498029 |
| Romania | Prahova | 0.0495 | 0.4716 | 0.10496183 |
| Moldova | Străşeni | 0.00765 | 0.0729 | 0.10493827 |
| Estonia | Harju | 0.0449 | 0.4327 | 0.10376704 |
| South Korea | Jeollanam-do | 0.127751 | 1.233513 | 0.1035668 |
| Switzerland | Appenzell Innerrhoden | 0.00176 | 0.017248 | 0.10204082 |
| Switzerland | Jura | 0.00853 | 0.083851 | 0.10172807 |
| Switzerland | Solothurn | 0.00803 | 0.079045 | 0.1015877 |
| Denmark | Sjælland | 0.0708 | 0.7031 | 0.10069691 |
| United Kingdom | Wales | 0.212 | 2.1218 | 0.09991517 |
| Lithuania | Telšiai | 0.043 | 0.435 | 0.09885057 |
| Switzerland | Sankt Gallen | 0.02 | 0.2026 | 0.09871668 |
| Ukraine | Chernivtsi | 0.0799 | 0.8097 | 0.09867852 |
| America | Florida | 1.68 | 17.0312 | 0.09864249 |
| Montenegro | Berane | 0.00485 | 0.0496 | 0.09778226 |
| Turkey | Osmaniye | 0.0324 | 0.332 | 0.09759036 |
| Montenegro | Žabljak | 0.00431 | 0.0445 | 0.09685393 |
| Switzerland | Schaffhausen | 0.00288 | 0.0298 | 0.0966443 |
| Czech Republic | Jihomoravský | 0.0689 | 0.7196 | 0.09574764 |
| Romania | Ilfov | 0.0151 | 0.1583 | 0.0953885 |
| Romania | Buzău | 0.0582 | 0.6103 | 0.09536294 |
| France | Centre-Val de Loire | 0.373 | 3.9181 | 0.0951992 |
| Croatia | Vukovarsko-Srijemska | 0.022904 | 0.2448 | 0.09356209 |
| Estonia | Pärnu | 0.0507 | 0.5419 | 0.0935597 |
| Switzerland | Glarus | 0.000969 | 0.010368 | 0.09346065 |
| Switzerland | Bern | 0.0551 | 0.595959 | 0.09245602 |
| Turkey | Adana | 0.127038 | 1.3844 | 0.09176394 |
| Romania | Dâmbovița | 0.0372 | 0.4054 | 0.09176122 |
| Moldova | Ialoveni | 0.00718 | 0.0783 | 0.0916986 |
| China | Hebei | 1.71898 | 18.8545 | 0.09117081 |
| Moldova | Ocniţa | 0.00544 | 0.0597 | 0.09112228 |
| Romania | Sibiu | 0.0494 | 0.5432 | 0.09094256 |
| France | Corse | 0.079 | 0.8722 | 0.09057556 |
| Romania | Vrancea | 0.0438 | 0.4857 | 0.09017912 |
| Croatia | Splitsko-Dalmatinska | 0.0403 | 0.4524 | 0.08908046 |
| Montenegro | Kotor | 0.00296 | 0.0335 | 0.08835821 |
| Moldova | Calarasi | 0.00665 | 0.0753 | 0.08831341 |
| Estonia | Viljandi | 0.0301 | 0.342 | 0.0880117 |
| Slovenia | Jugovzhodna Slovenija | 0.0235 | 0.2675 | 0.08785047 |
| Greece | Attica | 0.0328 | 0.3808 | 0.08613445 |
| Serbia | Zlatiborski | 0.0527 | 0.614 | 0.08583062 |
| Romania | Mureș | 0.057 | 0.6714 | 0.08489723 |
| Belgium | Luxembourg | 0.0377 | 0.4459 | 0.0845481 |
| Belgium | Diekirch |  |  | 0.0845481 |
| Belgium | Province of Luxembourg |  |  | 0.0845481 |
| Belgium | Grevenmacher |  |  | 0.0845481 |
| Hungary | Pest | 0.054004 | 0.639314 | 0.08447179 |
| Belgium | Hainaut | 0.0322 | 0.3813 | 0.08444794 |
| Estonia | Saare | 0.0248 | 0.2938 | 0.08441116 |
| South Korea | Gyeongsangbuk-do | 0.160443 | 1.903 | 0.08431056 |
| Romania | Bistrița-Năsăud | 0.0451 | 0.5355 | 0.08422035 |
| Romania | Bacău | 0.0556 | 0.6621 | 0.08397523 |
| Austria | Salzburg | 0.06 | 0.7156 | 0.08384572 |
| Slovakia | Banskobystrický | 0.0789 | 0.9454 | 0.08345674 |
| Turkey | Çankiri | 0.0621 | 0.7542 | 0.0823389 |
| Turkey | Hatay | 0.0453 | 0.5524 | 0.08200579 |
| Greece | Thessaly | 0.115 | 1.4037 | 0.08192634 |
| France | Provence-Alpes-Côte d'Azur | 0.257026 | 3.14 | 0.08185541 |
| Moldova | Glodeni | 0.00615 | 0.0754 | 0.08156499 |
| France | Normandie | 0.24301 | 3.0627 | 0.07934502 |
| Bulgaria | Grad Sofiya | 0.0109 | 0.1377 | 0.07915759 |
| Bulgaria | Pernik | 0.0189 | 0.23905 | 0.07906296 |
| Switzerland | Basel-Landschaft | 0.00409 | 0.051767 | 0.07900786 |
| Switzerland | Vaud | 0.0252 | 0.3212 | 0.07845579 |
| Bosnia and Herzegovina | Brčko | 0.00386 | 0.0493 | 0.07829615 |
| Switzerland | Schwyz | 0.0071 | 0.0908 | 0.07819383 |
| America | Washington | 1.443137 | 18.4661 | 0.07815061 |
| Ukraine | Donets'k | 0.203003 | 2.6517 | 0.07655579 |
| Croatia | Zadarska | 0.0278 | 0.3643 | 0.07631073 |
| Bosnia and Herzegovina | Republika Srpska | 0.187026 | 2.45328 | 0.07623508 |
| Moldova | Orhei | 0.00921 | 0.1228 | 0.075 |
| France | Bretagne | 0.254053 | 3.4023 | 0.07467096 |
| Lithuania | Taurages | 0.0328 | 0.4411 | 0.07435956 |
| America | Virginia | 0.821253 | 11.0787 | 0.074129 |
| Hungary | Nógrád | 0.0187 | 0.254548 | 0.07346355 |
| South Korea | Gyeongsangnam-do | 0.077155 | 1.0533 | 0.07325074 |
| United Kingdom | Northern Ireland | 0.104 | 1.4333 | 0.07255983 |
| Moldova | Bălţi | 0.000562 | 0.0078 | 0.07205128 |
| Romania | Brașov | 0.0386 | 0.5363 | 0.07197464 |
| Moldova | Rezina | 0.00442 | 0.0621 | 0.07117552 |
| Macedonia | Delčevo | 0.00296 | 0.0422 | 0.07014218 |
| France | Île-de-France | 0.0838 | 1.2012 | 0.06976357 |
| Bulgaria | Sofia | 0.0491 | 0.7059 | 0.06955659 |
| Estonia | Lääne | 0.0126 | 0.1816 | 0.06938326 |
| Greece | East Macedonia and Thrace | 0.097703 | 1.4158 | 0.06900904 |
| Serbia | Sremski | 0.024021 | 0.3486 | 0.06890706 |
| Ukraine | Vinnytsya | 0.182 | 2.6513 | 0.06864557 |
| Estonia | Järva | 0.0178 | 0.2623 | 0.06786123 |
| Moldova | Nisporeni | 0.00424 | 0.063 | 0.06730159 |
| Estonia | Jõgeva | 0.0175 | 0.2603 | 0.06723012 |
| Romania | Hunedoara | 0.0473 | 0.7063 | 0.06696871 |
| Romania | Cluj | 0.0445 | 0.6674 | 0.06667666 |
| Turkey | Manisa | 0.0888 | 1.3339 | 0.06657171 |
| Greece | Central Macedonia | 0.125 | 1.8811 | 0.06645048 |
| Italy | Calabria | 0.099007 | 1.5081 | 0.06565016 |
| Belgium | Brabant Wallon | 0.00717 | 0.1097 | 0.06536007 |
| Hungary | Abaúj-Zemplén | 0.047204 | 0.724967 | 0.06511193 |
| Hungary | Borsod-Abaúj-Zemplén | 0.047204 | 0.724967 | 0.06511193 |
| Estonia | Tartu | 0.0218 | 0.3349 | 0.06509406 |
| Romania | Giurgiu | 0.0229 | 0.3526 | 0.06494611 |
| Moldova | Briceni | 0.00527 | 0.0814 | 0.06474201 |
| Montenegro | Budva | 0.000789 | 0.0122 | 0.06467213 |
| Lithuania | Kauno | 0.0523 | 0.8089 | 0.06465571 |
| Moldova | Şoldăneşti | 0.00385 | 0.05984 | 0.06433824 |
| North Korea | P'yŏngan-namdo | 0.078811 | 1.2333 | 0.06390254 |
| Ukraine | Zakarpattia Oblast | 0.081302 | 1.2777 | 0.06363153 |
| France | Pays de la Loire | 0.204004 | 3.2082 | 0.0635883 |
| Turkey | Gümüshane | 0.0423 | 0.6668 | 0.06343731 |
| Lithuania | Klaipedos | 0.0329 | 0.5209 | 0.06315992 |
| Montenegro | Plav | 0.00207 | 0.0328 | 0.06310976 |
| Japan | Kagawa | 0.011703 | 0.1876 | 0.06238273 |
| Hungary | Gyor-Moson-Sopron | 0.0262 | 0.420805 | 0.06226162 |
| China | Liaoning | 0.92128 | 14.8379 | 0.06208965 |
| Hungary | Csongrád | 0.026401 | 0.426271 | 0.06193478 |
| Albania | Durrës | 0.00474 | 0.0766 | 0.0618799 |
| Moldova | Donduseni | 0.00398 | 0.0645 | 0.06170543 |
| United Kingdom | England | 0.814006 | 13.2932 | 0.06123477 |
| Slovenia | Pomurska | 0.00816 | 0.1337 | 0.06103216 |
| Serbia | Raški | 0.023904 | 0.3918 | 0.06101072 |
| Ukraine | Khmel'nyts'kyy | 0.125 | 2.0645 | 0.06054735 |
| Serbia | Zapadno-Bački | 0.014609 | 0.242 | 0.06036777 |
| Turkey | Çorum | 0.075 | 1.2428 | 0.0603476 |
| Albania | Lezhë | 0.00971 | 0.162 | 0.05993827 |
| Slovakia | Prešovský | 0.0535 | 0.897369 | 0.05961873 |
| Macedonia | Demir Kapija | 0.00183 | 0.031106 | 0.05883109 |
| Moldova | Făleşti | 0.0063 | 0.1073 | 0.05871389 |
| France | Hauts-de-France | 0.186 | 3.1813 | 0.05846666 |
| Slovakia | Trenčiansky | 0.026 | 0.450208 | 0.05775108 |
| Croatia | Osjecko-Baranjska | 0.023909 | 0.4149 | 0.05762593 |
| Turkey | Trabzon | 0.0265 | 0.4628 | 0.05726016 |
| Moldova | Cimişlia | 0.00527 | 0.0923 | 0.05709642 |
| Turkey | Sakarya | 0.0272 | 0.4824 | 0.05638474 |
| North Korea | Hamgyŏng-namdo | 0.106015 | 1.897 | 0.05588561 |
| Switzerland | Fribourg | 0.00932 | 0.16708 | 0.05578166 |
| Lithuania | Marijampoles | 0.0247 | 0.4463 | 0.05534394 |
| Moldova | Sîngerei | 0.00562 | 0.1033 | 0.05440465 |
| Romania | Vaslui | 0.0288 | 0.5318 | 0.0541557 |
| Montenegro | Bijelo Polje | 0.00497 | 0.0924 | 0.05378788 |
| Albania | Tiranë | 0.00887 | 0.1652 | 0.05369249 |
| Romania | Alba | 0.033402 | 0.6242 | 0.05351169 |
| Moldova | Chişinău | 0.003 | 0.0563 | 0.05328597 |
| Estonia | Rapla | 0.0147 | 0.2765 | 0.05316456 |
| Lithuania | Šiauliai | 0.0453 | 0.854 | 0.0530445 |
| Bulgaria | Plovdiv | 0.0316 | 0.59729 | 0.05290562 |
| Lithuania | Panevezio | 0.0411 | 0.7881 | 0.05215074 |
| Serbia | Južno-Banatski | 0.022057 | 0.4245 | 0.05195995 |
| Hungary | Hajdú-Bihar | 0.0318 | 0.621051 | 0.05120352 |
| Slovakia | Trnavský | 0.0211 | 0.4145 | 0.0509047 |
| Moldova | Ungheni | 0.00551 | 0.1083 | 0.05087719 |
| Hungary | Heves | 0.018401 | 0.363721 | 0.05059097 |
| Romania | Maramureș | 0.0318 | 0.6304 | 0.05044416 |
| Hungary | Zala | 0.018901 | 0.378389 | 0.04995124 |
| Turkey | Burdur | 0.0358 | 0.7175 | 0.04989547 |
| Moldova | Cantemir | 0.00428 | 0.087 | 0.0491954 |
| Hungary | Jász-Nagykun-Szolnok | 0.0274 | 0.558161 | 0.04908978 |
| America | Oregon | 1.24817 | 25.4799 | 0.04898646 |
| Turkey | Istanbul | 0.02674 | 0.5461 | 0.04896539 |
| Romania | Iași | 0.0266 | 0.5476 | 0.0485756 |
| Italy | Liguria | 0.026319 | 0.5422 | 0.04854113 |
| Turkey | Denizli | 0.0587 | 1.2134 | 0.04837646 |
| Macedonia | Kičevo | 0.000235 | 0.004914 | 0.04782255 |
| Moldova | Teleneşti | 0.00406 | 0.0849 | 0.04782097 |
| Macedonia | Berovo | 0.00286 | 0.05987 | 0.04777017 |
| Moldova | Rîşcani | 0.00447 | 0.0936 | 0.04775641 |
| Kosovo | Peyz | 0.00283 | 0.060263 | 0.04696082 |
| Switzerland | Obwalden | 0.00227 | 0.049058 | 0.04627176 |
| Macedonia | Valandovo | 0.00153 | 0.03314 | 0.04616777 |
| Ukraine | Kirovohrad | 0.112 | 2.4588 | 0.04555068 |
| Moldova | Criuleni | 0.00312 | 0.0688 | 0.04534884 |
| Switzerland | Nidwalden | 0.00125 | 0.027584 | 0.04531613 |
| Romania | Dolj | 0.0331 | 0.7414 | 0.04464527 |
| Belgium | Oost-Vlaanderen | 0.0134 | 0.3007 | 0.04456269 |
| Moldova | Ştefan Voda | 0.00441 | 0.0998 | 0.04418838 |
| Bulgaria | Burgas | 0.034109 | 0.774807 | 0.04402258 |
| Croatia | Brodsko-Posavska | 0.008916 | 0.2027 | 0.04398619 |
| Albania | Berat | 0.0079 | 0.1798 | 0.04393771 |
| Moldova | Dubăsari | 0.00135 | 0.0309 | 0.04368932 |
| Romania | Gorj | 0.0244 | 0.5602 | 0.04355587 |
| Hungary | Békés | 0.024502 | 0.562971 | 0.04352267 |
| Slovenia | Spodnjeposavska | 0.00419 | 0.0968 | 0.04328512 |
| Moldova | Anenii Noi | 0.00385 | 0.0892 | 0.04316143 |
| Turkey | Giresun | 0.0303 | 0.7025 | 0.04313167 |
| Croatia | Istarska | 0.01201 | 0.282 | 0.04258865 |
| Moldova | Leova | 0.00328 | 0.0775 | 0.04232258 |
| Turkey | Eskisehir | 0.0588 | 1.396 | 0.04212034 |
| Bulgaria | Varna | 0.016 | 0.38195 | 0.0418903 |
| South Korea | Gwangju | 0.002091 | 0.050124 | 0.04171654 |
| Hungary | Veszprém | 0.0186 | 0.446365 | 0.04166993 |
| Turkey | Usak | 0.0231 | 0.5555 | 0.04158416 |
| Greece | Western Macedonia | 0.0389 | 0.9451 | 0.04115967 |
| Kosovo | Mitrovica | 0.000028 | 0.000683 | 0.04099561 |
| Moldova | Causeni | 0.00474 | 0.1163 | 0.04075666 |
| Slovakia | Košický | 0.0272 | 0.675326 | 0.04027684 |
| Bulgaria | Stara Zagora | 0.0207 | 0.51515 | 0.04018247 |
| Macedonia | Rankovce | 0.000967 | 0.024071 | 0.04017282 |
| Turkey | Bartın | 0.009251 | 0.233 | 0.03970386 |
| Kosovo | Dečani | 0.00116 | 0.029397 | 0.03945981 |
| Bulgaria | Razgrad | 0.0104 | 0.26397 | 0.03939842 |
| Turkey | Zonguldak | 0.013102 | 0.3342 | 0.03920407 |
| Romania | Olt | 0.0214 | 0.5498 | 0.03892324 |
| Romania | Teleorman | 0.0223 | 0.579 | 0.03851468 |
| Hungary | Komárom-Esztergom | 0.00872 | 0.226452 | 0.03850706 |
| Turkey | Rize | 0.0147 | 0.3835 | 0.03833116 |
| Romania | Mehedinți | 0.0189 | 0.4933 | 0.0383134 |
| Moldova | Soroca | 0.00397 | 0.1043 | 0.03806328 |
| Macedonia | Novatsi | 0.00284 | 0.075353 | 0.03768928 |
| Slovenia | Goriška | 0.00867 | 0.2325 | 0.03729032 |
| Hungary | Somogy | 0.022104 | 0.606507 | 0.03644476 |
| Croatia | Šibensko-Kninska | 0.0109 | 0.2994 | 0.03640615 |
| Hungary | Tolna | 0.013326 | 0.370316 | 0.03598548 |
| Canada | British Columbia | 3.39 | 94.4735 | 0.03588308 |
| Macedonia | Makedonski Brod | 0.00314 | 0.088897 | 0.03532178 |
| Croatia | Licko-Senjska | 0.0188 | 0.536 | 0.03507463 |
| Ukraine | Ternopil' | 0.0483 | 1.3823 | 0.03494176 |
| Romania | Botoșani | 0.0172 | 0.4986 | 0.03449659 |
| Hungary | Fejér | 0.015001 | 0.435845 | 0.0344182 |
| China | Shandong | 0.54179 | 15.7901 | 0.03431201 |
| South Korea | Ulsan | 0.003624 | 0.1057136 | 0.0342813 |
| Turkey | Kocaeli | 0.011638 | 0.3397 | 0.03425964 |
| Macedonia | Karpoš | 0.000359 | 0.0105 | 0.03419048 |
| Albania | Elbasan | 0.0109 | 0.3199 | 0.03407315 |
| South Korea | Jeju | 0.00619 | 0.1826 | 0.03389923 |
| Moldova | Edineţ | 0.00316 | 0.0933 | 0.03386924 |
| Italy | Friuli-Venezia Giulia | 0.026369 | 0.7858 | 0.03355688 |
| France | Occitanie | 0.660025 | 19.8113 | 0.03331558 |
| Ukraine | Dnipropetrovs'k | 0.106023 | 3.1974 | 0.03315913 |
| Macedonia | Strumitsa | 0.00106 | 0.032149 | 0.03297148 |
| Macedonia | Strumica | 0.00106 | 0.032149 | 0.03297148 |
| Mexico | Veracruz | 0.235796 | 7.1826 | 0.03282878 |
| Turkey | Ordu | 0.0192 | 0.5861 | 0.03275891 |
| Poland | Małopolskie | 0.196 | 6 | 0.03266667 |
| Switzerland | Basel-Stadt | 0.000119 | 0.003695 | 0.03220568 |
| Turkey | Samsun | 0.031052 | 0.9725 | 0.03193008 |
| Croatia | Grad Zagreb | 0.002017 | 0.064 | 0.03151563 |
| Albania | Vlorë | 0.0085 | 0.2706 | 0.03141168 |
| Serbia | Srednje-Banatski | 0.010207 | 0.3256 | 0.03134828 |
| Romania | Galați | 0.0138 | 0.4466 | 0.03090013 |
| Macedonia | Kavadartsi | 0.00306 | 0.099244 | 0.0308331 |
| America | California | 1.26393 | 42.3967 | 0.02981199 |
| Turkey | Isparta | 0.026 | 0.8733 | 0.02977213 |
| Macedonia | Želino | 0.000597 | 0.020104 | 0.02969558 |
| Slovenia | Zasavska | 0.00144 | 0.0485 | 0.02969072 |
| Greece | South Aegean | 0.0156 | 0.5286 | 0.02951192 |
| Italy | Sardegna | 0.071 | 2.409 | 0.02947281 |
| Montenegro | Bar | 0.00174 | 0.0598 | 0.02909699 |
| Macedonia | Bitola | 0.00225 | 0.078795 | 0.02855511 |
| Ukraine | Crimea | 0.074446 | 2.6081 | 0.02854415 |
| Romania | Călărași | 0.0145 | 0.5088 | 0.02849843 |
| Italy | Veneto | 0.052318 | 1.8399 | 0.02843524 |
| Macedonia | Bogdanci | 0.000325 | 0.011454 | 0.02837437 |
| Turkey | Mersin | 0.045107 | 1.601 | 0.02817427 |
| Romania | Ialomița | 0.0125 | 0.4453 | 0.02807096 |
| Romania | Bihor | 0.0208 | 0.7544 | 0.02757158 |
| North Korea | Hamgyŏng-bukto | 0.056015 | 2.0345 | 0.02753256 |
| Moldova | Floreşti | 0.00303 | 0.1108 | 0.02734657 |
| Italy | Apulia | 0.052702 | 1.9358 | 0.02722492 |
| America | Texas | 1.845364 | 68.5662 | 0.02691361 |
| Moldova | Administrative-Territorial Units of the Left Bank of the Dniester | 0.0112 | 0.4163 | 0.02690368 |
| Croatia | Karlovacka | 0.009723 | 0.3622 | 0.02684428 |
| Moldova | Cahul | 0.00412 | 0.1546 | 0.02664942 |
| Serbia | Moravički | 0.007972 | 0.3016 | 0.02643236 |
| Bulgaria | Haskovo | 0.0142 | 0.553329 | 0.02566285 |
| Macedonia | Makedonska Kamenica | 0.000488 | 0.019037 | 0.02563429 |
| Bulgaria | Silistra | 0.00725 | 0.28463 | 0.02547166 |
| Bulgaria | Ruse | 0.00707 | 0.28034 | 0.02521938 |
| Albania | Korçë | 0.00929 | 0.3711 | 0.02503368 |
| Romania | Bucharest | 0.000586 | 0.0238 | 0.02462185 |
| Albania | Shkodër | 0.00877 | 0.3562 | 0.024621 |
| Belgium | West-Vlaanderen | 0.00774 | 0.3197 | 0.0242102 |
| Ukraine | Kherson | 0.068624 | 2.8461 | 0.02411159 |
| China | Jiangsu | 0.2543 | 10.66 | 0.02385553 |
| America | Oklahoma | 0.4315 | 18.1037 | 0.02383491 |
| Moldova | Basarabeasca | 0.000696 | 0.0295 | 0.02359322 |
| Bulgaria | Shumen | 0.00795 | 0.33897 | 0.0234534 |
| Romania | Tulcea | 0.0199 | 0.8499 | 0.02341452 |
| Albania | Gjirokastër | 0.00674 | 0.2884 | 0.02337032 |
| Macedonia | Kriva Palanka | 0.00112 | 0.048081 | 0.02329402 |
| Macedonia | Prilep | 0.00278 | 0.119444 | 0.02327451 |
| Turkey | Edirne | 0.0143 | 0.6145 | 0.02327095 |
| Kosovo | Zubin Potok | 0.000758 | 0.033438 | 0.02266882 |
| Hungary | Baranya | 0.009939 | 0.44296 | 0.02243769 |
| Turkey | Afyon | 0.0314 | 1.4016 | 0.02240297 |
| Turkey | Ankara | 0.057 | 2.5632 | 0.02223783 |
| Turkey | Ardahan | 0.0109 | 0.4934 | 0.02209161 |
| Italy | Toscana | 0.050735 | 2.2994 | 0.02206445 |
| Turkey | K. Maras | 0.0319 | 1.452 | 0.0219697 |
| China | Jilin | 0.418189 | 19.1202 | 0.02187158 |
| South Korea | Daegu | 0.003273 | 0.149951 | 0.02182713 |
| Czech Republic | Prague | 0.00108 | 0.0496 | 0.02177419 |
| Ukraine | Odessa | 0.072 | 3.331 | 0.02161513 |
| Albania | Fier | 0.00407 | 0.189 | 0.02153439 |
| Turkey | Yozgat | 0.0293 | 1.369 | 0.02140248 |
| Montenegro | Plužine | 0.00182 | 0.0854 | 0.02131148 |
| China | Yunnan | 0.816585 | 38.3186 | 0.02131041 |
| Kosovo | Štrpce | 0.000516 | 0.02477 | 0.02083165 |
| North Korea | P'YŎNGYANG | 0.006609 | 0.3194 | 0.02069192 |
| Serbia | Severno-Bački | 0.00368 | 0.1784 | 0.0206278 |
| Italy | Emilia-Romagna | 0.046284 | 2.2446 | 0.02062016 |
| Italy | Campania | 0.028011 | 1.359 | 0.02061148 |
| Bulgaria | Sliven | 0.00727 | 0.35441 | 0.02051297 |
| Turkey | Düzce | 0.00508 | 0.2492 | 0.02038523 |
| South Korea | Busan | 0.001565 | 0.077 | 0.02032468 |
| Austria | Tirol | 0.0529 | 2.6674 | 0.01983205 |
| Italy | Lazio | 0.03342 | 1.7236 | 0.01938965 |
| Turkey | Amasya | 0.0108 | 0.5628 | 0.01918977 |
| Slovakia | Nitriansky | 0.0121 | 0.634394 | 0.01907332 |
| Romania | Timiș | 0.0165 | 0.8697 | 0.01897206 |
| Macedonia | Ohrid | 0.000739 | 0.038993 | 0.01895212 |
| Ukraine | Zaporizhzhya | 0.051405 | 2.718 | 0.0189128 |
| Italy | Abruzzo | 0.020242 | 1.0763 | 0.01880702 |
| Kosovo | Leposavić | 0.00101 | 0.053905 | 0.01873667 |
| Italy | Sicily | 0.0477 | 2.5832 | 0.01846547 |
| Serbia | Podunavski | 0.002286 | 0.1248 | 0.01831731 |
| China | Tianjin | 0.0207 | 1.1917 | 0.01737014 |
| Bulgaria | Targovishte | 0.00443 | 0.25585 | 0.01731483 |
| Turkey | Tokat | 0.0173 | 1.0042 | 0.01722764 |
| Romania | Sălaj | 0.00656 | 0.3864 | 0.01697723 |
| Serbia | Pčinjski | 0.00596 | 0.352 | 0.01693182 |
| Montenegro | Andrijevica | 0.000477 | 0.0283 | 0.01685512 |
| Macedonia | Lozovo | 0.00028 | 0.016632 | 0.01683502 |
| Macedonia | Resen | 0.000897 | 0.055077 | 0.01628629 |
| Croatia | Sisacko-Moslavacka | 0.00724 | 0.448 | 0.01616071 |
| South Korea | Incheon | 0.001668 | 0.106263 | 0.0156969 |
| Serbia | Braničevski | 0.006045 | 0.3865 | 0.01564036 |
| Turkey | Erzurum | 0.0369 | 2.5006 | 0.01475646 |
| Romania | Satu Mare | 0.00641 | 0.4418 | 0.01450883 |
| Kosovo | Kosovo Polje | 0.000122 | 0.008409 | 0.01450826 |
| Bulgaria | Dobrich | 0.00684 | 0.471971 | 0.01449242 |
| Romania | Arad | 0.0112 | 0.7754 | 0.01444416 |
| Serbia | Mačvanski | 0.004652 | 0.3268 | 0.01423501 |
| Moldova | Bender | 0.000138 | 0.0097 | 0.0142268 |
| Macedonia | Petrovec | 0.000285 | 0.020193 | 0.0141138 |
| Serbia | Kolubarski | 0.00343 | 0.2474 | 0.01386419 |
| Greece | Crete | 0.0114 | 0.8336 | 0.01367562 |
| Mexico | Puebla | 0.046115 | 3.4306 | 0.01344225 |
| Bulgaria | Gabrovo | 0.00269 | 0.202301 | 0.01329702 |
| America | Delaware | 0.008561 | 0.6446 | 0.0132811 |
| Macedonia | Oslomej | 0.00016 | 0.012109 | 0.01321331 |
| America | Maryland | 0.041503 | 3.2131 | 0.01291681 |
| Bulgaria | Veliko Tarnovo | 0.00601 | 0.4662 | 0.01289146 |
| Macedonia | Negotino | 0.00017 | 0.01329 | 0.01279157 |
| Bulgaria | Vidin | 0.00379 | 0.30329 | 0.01249629 |
| Bulgaria | Montana | 0.00453 | 0.36355 | 0.01246046 |
| Serbia | Rasinski | 0.003287 | 0.2667 | 0.01232471 |
| Bulgaria | Yambol | 0.00404 | 0.33555 | 0.01203993 |
| Croatia | Varaždinska | 0.00151 | 0.126 | 0.01198413 |
| Serbia | Zaječarski | 0.00429 | 0.3623 | 0.01184102 |
| Switzerland | Uri | 0.00127 | 0.1077 | 0.01179201 |
| Macedonia | Demir Hisar | 0.000563 | 0.048013 | 0.01172599 |
| Moldova | Taraclia | 0.000789 | 0.0674 | 0.01170623 |
| China | Heilongjiang | 0.521972 | 45.2538 | 0.01153432 |
| Croatia | Medimurska | 0.000835 | 0.073 | 0.01143836 |
| Switzerland | Ticino | 0.003192 | 0.2812 | 0.01135135 |
| Austria | Wien | 0.000468 | 0.04146 | 0.01128799 |
| Romania | Brăila | 0.00532 | 0.4766 | 0.0111624 |
| Macedonia | Debarca | 0.000474 | 0.042539 | 0.01114272 |
| Bulgaria | Vratsa | 0.004031 | 0.36197 | 0.01113628 |
| Romania | Constanța | 0.00782 | 0.7071 | 0.01105926 |
| Italy | Lombardia | 0.026334 | 2.3861 | 0.01103642 |
| Montenegro | Danilovgrad | 0.000552 | 0.0501 | 0.01101796 |
| Mexico | Tabasco | 0.027116 | 2.4731 | 0.01096438 |
| Turkey | Kirklareli | 0.006933 | 0.6459 | 0.01073386 |
| Moldova | Găgăuzia | 0.00192 | 0.1832 | 0.01048035 |
| Croatia | Koprivničko-Križevačka | 0.00175 | 0.1734 | 0.01009227 |
| North Korea | P'yŏngan-bukto | 0.0123 | 1.2191 | 0.01008941 |
| Serbia | Pomoravski | 0.002587 | 0.2614 | 0.00989671 |
| Ukraine | Mykolayiv | 0.0243 | 2.4598 | 0.00987885 |
| Switzerland | Valais | 0.005152 | 0.5224 | 0.00986217 |
| Macedonia | Zajas | 0.000157 | 0.016108 | 0.00974671 |
| Turkey | Sanliurfa | 0.0182 | 1.9242 | 0.00945848 |
| Italy | Umbria | 0.007692 | 0.8456 | 0.0090965 |
| Bulgaria | Lovech | 0.00372 | 0.4128 | 0.00901163 |
| Macedonia | Tetovo | 0.000235 | 0.026189 | 0.00897323 |
| Turkey | Kars | 0.00853 | 0.9594 | 0.00889097 |
| Turkey | Sivas | 0.0249 | 2.8164 | 0.00884107 |
| Macedonia | Sopište | 0.000194 | 0.02221 | 0.0087348 |
| Macedonia | Saraj | 0.000194 | 0.022906 | 0.0084694 |
| Bulgaria | Pleven | 0.00383 | 0.465332 | 0.00823068 |
| Turkey | Erzincan | 0.00959 | 1.1815 | 0.0081168 |
| Italy | Piemonte | 0.020591 | 2.5402 | 0.00810605 |
| Croatia | Zagrebačka | 0.002476 | 0.3078 | 0.00804418 |
| Moldova | Drochia | 0.000802 | 0.1 | 0.00802 |
| Kosovo | Kamenica | 0.000334 | 0.041661 | 0.00801709 |
| America | New Hampshire | 0.018892 | 2.4214 | 0.0078021 |
| China | Inner Mongolia | 0.884831 | 114.5499 | 0.00772442 |
| Canada | New Brunswick | 0.0552 | 7.2908 | 0.00757119 |
| Italy | Basilicata | 0.007565 | 0.9995 | 0.00756878 |
| America | Idaho | 0.16366 | 21.6443 | 0.00756134 |
| Serbia | Jablanički | 0.00208 | 0.2769 | 0.00751174 |
| Turkey | Tekirdag | 0.00458 | 0.619 | 0.00739903 |
| Italy | Valle d'Aosta | 0.00241 | 0.3263 | 0.00738584 |
| Austria | Vorarlberg | 0.0185 | 2.5338 | 0.00730129 |
| Macedonia | Staro Nagoričane | 0.000316 | 0.043341 | 0.00729102 |
| Serbia | Borski | 0.00251 | 0.3507 | 0.00715711 |
| Turkey | Kilis | 0.00115 | 0.1642 | 0.00700365 |
| Serbia | Pirotski | 0.0019 | 0.2761 | 0.00688156 |
| Montenegro | Cetinje | 0.000621 | 0.091 | 0.00682418 |
| America | Montana | 0.259003 | 38.0831 | 0.006801 |
| Switzerland | Graubünden | 0.00483 | 0.7105 | 0.00679803 |
| Bosnia and Herzegovina | Federacija Bosna i Hercegovina | 0.176011 | 26.11105 | 0.00674086 |
| Macedonia | Sveti Nikole | 0.000325 | 0.048289 | 0.00673031 |
| Macedonia | Aracinovo | 0.000021 | 0.00313 | 0.00670927 |
| Mexico | Guerrero | 0.042129 | 6.3596 | 0.00662447 |
| Italy | Molise | 0.002933 | 0.4438 | 0.00660883 |
| Serbia | Nišavski | 0.001782 | 0.2729 | 0.00652986 |
| Switzerland | Genève | 0.000447 | 0.0685 | 0.00652555 |
| Macedonia | Aerodrom | 0.000013 | 0.002 | 0.0065 |
| Croatia | Viroviticko-Podravska | 0.0013 | 0.2021 | 0.00643246 |
| Macedonia | Kruševo | 0.000121 | 0.019068 | 0.00634571 |
| America | Tennessee | 0.068803 | 10.9153 | 0.00630335 |
| Montenegro | Nikšic | 0.0013 | 0.2065 | 0.0062954 |
| Macedonia | Probištip | 0.0002 | 0.032557 | 0.00614307 |
| Macedonia | Butel | 0.000037 | 0.006079 | 0.00608653 |
| America | Vermont | 0.015062 | 2.4906 | 0.00604754 |
| Kosovo | Gnjilane | 0.000235 | 0.039184 | 0.00599735 |
| Kosovo | Partesh | 0.000235 | 0.039184 | 0.00599735 |
| Kosovo | Ranilug | 0.000235 | 0.039184 | 0.00599735 |
| Kosovo | Dragaš | 0.00026 | 0.043385 | 0.00599285 |
| Kosovo | Dragash | 0.00026 | 0.043385 | 0.00599285 |
| Macedonia | Kočani | 0.000224 | 0.037544 | 0.00596633 |
| Serbia | Toplički | 0.00128 | 0.2231 | 0.00573734 |
| Kosovo | Đakovica | 0.000335 | 0.058662 | 0.00571068 |
| Kosovo | Prizren | 0.000349 | 0.062686 | 0.00556743 |
| Macedonia | Vraneštica | 0.000058 | 0.010913 | 0.00531476 |
| Macedonia | Gjorče Petrov | 0.000035 | 0.006693 | 0.00522934 |
| Turkey | Karaman | 0.00452 | 0.8678 | 0.00520857 |
| Macedonia | Kisela Voda | 0.000024 | 0.004686 | 0.00512164 |
| Kosovo | Uroševac | 0.000176 | 0.034461 | 0.00510722 |
| Kosovo | Hani i Elezit |  |  | 0.00510722 |
| Italy | Marche | 0.004668 | 0.9366 | 0.00498398 |
| Mexico | Colima | 0.00274 | 0.5627 | 0.00486938 |
| Albania | Dibër | 0.00125 | 0.2586 | 0.00483372 |
| America | Maine | 0.043691 | 9.1633 | 0.00476804 |
| Macedonia | Vinitsa | 0.000203 | 0.043267 | 0.0046918 |
| Macedonia | Mavrovo and Rostuša | 0.000311 | 0.066319 | 0.00468946 |
| Turkey | Gaziantep | 0.00311 | 0.6803 | 0.00457151 |
| Kosovo | Lipljan | 0.000154 | 0.033841 | 0.00455069 |
| Macedonia | Gradsko | 0.000107 | 0.023619 | 0.00453025 |
| Macedonia | Štip | 0.00026 | 0.0583 | 0.00445969 |
| Kosovo | Suva Reka | 0.000159 | 0.036104 | 0.00440394 |
| Turkey | Batman | 0.00197 | 0.4477 | 0.00440027 |
| Croatia | Požeško-Slavonska | 0.000688 | 0.1821 | 0.00377814 |
| Macedonia | Lipkovo | 0.0001 | 0.026782 | 0.00373385 |
| Mexico | Michoacán | 0.02168 | 5.8599 | 0.00369972 |
| Turkey | Konya | 0.0149 | 4.0838 | 0.00364856 |
| Croatia | Bjelovarska-Bilogorska | 0.000959 | 0.2638 | 0.00363533 |
| Macedonia | Kumanovo | 0.000183 | 0.050948 | 0.0035919 |
| America | New York | 0.04808 | 14.1297 | 0.00340276 |
| Macedonia | Konče | 0.000077 | 0.023305 | 0.00330401 |
| Kosovo | Zvečan | 0.000039 | 0.012301 | 0.00317047 |
| Macedonia | Drugovo | 0.000119 | 0.0385 | 0.00309091 |
| America | Michigan | 0.07737 | 25.0487 | 0.00308878 |
| Turkey | Nigde | 0.00213 | 0.7234 | 0.00294443 |
| Serbia | Šumadijski | 0.000695 | 0.2387 | 0.0029116 |
| South Korea | Seoul | 0.003677 | 1.2685 | 0.0028987 |
| Canada | Ontario | 0.307 | 107.6395 | 0.00285211 |
| Mexico | Oaxaca | 0.02665 | 9.3757 | 0.00284245 |
| Croatia | Krapinsko-Zagorska | 0.000349 | 0.123 | 0.0028374 |
| Turkey | Malatya | 0.00347 | 1.2259 | 0.00283057 |
| Macedonia | Karbinci | 0.000065 | 0.02297 | 0.00282978 |
| Montenegro | Mojkovac | 0.000103 | 0.0367 | 0.00280654 |
| China | Gansu | 0.1191 | 42.5889 | 0.0027965 |
| Albania | Kukës | 0.000645 | 0.2374 | 0.00271693 |
| Turkey | Hakkari | 0.0019 | 0.7095 | 0.00267794 |
| Macedonia | Šuto Orizari | 0.000002 | 0.000748 | 0.0026738 |
| Macedonia | Gazi Baba | 0.000026 | 0.010086 | 0.00257783 |
| Kosovo | Klina | 0.000078 | 0.030902 | 0.00252411 |
| Mexico | Chiapas | 0.017767 | 7.3311 | 0.00242351 |
| Macedonia | Struga | 0.000116 | 0.0483 | 0.00240166 |
| Kosovo | Vitina | 0.000063 | 0.026969 | 0.00233602 |
| Kosovo | Kllokoti | 0.000063 | 0.026969 | 0.00233602 |
| Kosovo | Orahovac | 0.000064 | 0.02759 | 0.00231968 |
| America | Massachusetts | 0.0063 | 2.7336 | 0.00230465 |
| Turkey | Kayseri | 0.0039 | 1.7116 | 0.00227857 |
| Turkey | Sirnak | 0.00156 | 0.7078 | 0.00220401 |
| Turkey | Siirt | 0.00125 | 0.5717 | 0.00218646 |
| Kosovo | Podujevo | 0.000137 | 0.063259 | 0.0021657 |
| Macedonia | Lake Ohrid | 0.000075 | 0.0358 | 0.00209497 |
| Turkey | Mardin | 0.00181 | 0.878 | 0.0020615 |
| Macedonia | Ilinden | 0.00002 | 0.009702 | 0.00206143 |
| Japan | Okinawa | 0.000451 | 0.2281 | 0.0019772 |
| China | Shanghai | 0.001643 | 0.8359 | 0.00196555 |
| Canada | Alberta | 0.126 | 66.1848 | 0.00190376 |
| Canada | Nova Scotia | 0.0104 | 5.5284 | 0.0018812 |
| Macedonia | Jegunovce | 0.000033 | 0.017693 | 0.00186514 |
| Macedonia | Zelenikovo | 0.000033 | 0.017695 | 0.00186493 |
| Kosovo | Kačanik | 0.000038 | 0.021128 | 0.00179856 |
| Macedonia | Veles | 0.000074 | 0.042745 | 0.0017312 |
| Turkey | Diyarbakir | 0.00259 | 1.5168 | 0.00170754 |
| Turkey | Adiyaman | 0.00121 | 0.7337 | 0.00164918 |
| Macedonia | Gostivar | 0.000084 | 0.051339 | 0.00163618 |
| Kosovo | Glogovac | 0.000045 | 0.027563 | 0.00163262 |
| Kosovo | Vucitrn | 0.000056 | 0.034485 | 0.00162389 |
| America | Kentucky | 0.016134 | 10.4656 | 0.00154162 |
| America | Missouri | 0.02734 | 18.054 | 0.00151435 |
| Mexico | Yucatán | 0.005579 | 3.9524 | 0.00141155 |
| Hungary | Budapest | 0.000963 | 0.6917 | 0.00139222 |
| Turkey | Tunceli | 0.00103 | 0.7582 | 0.00135848 |
| Turkey | Bitlis | 0.00108 | 0.8294 | 0.00130215 |
| Mexico | Tlaxcala | 0.000496 | 0.4016 | 0.00123506 |
| Mexico | Campeche | 0.007062 | 5.7507 | 0.00122802 |
| Macedonia | Centar župa | 0.000013 | 0.010721 | 0.00121257 |
| Macedonia | Češinovo-Obleševo | 0.000016 | 0.01322 | 0.00121029 |
| Georgia | Kakheti | 0.00133 | 1.1311 | 0.00117585 |
| Canada | Québec | 0.177 | 154.2056 | 0.00114782 |
| Kosovo | Priština | 0.000059 | 0.052313 | 0.00112783 |
| Macedonia | Studeničani | 0.000031 | 0.027616 | 0.00112254 |
| Kosovo | Istog | 0.000051 | 0.045436 | 0.00112246 |
| Mexico | México | 0.002496 | 2.2351 | 0.00111673 |
| Macedonia | Radoviš | 0.000055 | 0.049748 | 0.00110557 |
| Mexico | Tamaulipas | 0.008866 | 8.0249 | 0.00110481 |
| America | Pennsylvania | 0.013039 | 11.928 | 0.00109314 |
| America | Connecticut | 0.001474 | 1.4357 | 0.00102668 |
| Macedonia | Kratovo | 0.000038 | 0.037544 | 0.00101215 |
| Mexico | Hidalgo | 0.002082 | 2.0813 | 0.00100034 |
| Macedonia | Debar | 0.000014 | 0.014567 | 0.00096108 |
| America | Rhode Island | 0.000383 | 0.4001 | 0.00095726 |
| China | Ningxia | 0.004819 | 5.1893 | 0.00092864 |
| Mexico | Nayarit | 0.002524 | 2.7857 | 0.00090606 |
| Macedonia | Zrnovci | 0.000005 | 0.005582 | 0.00089574 |
| America | New Mexico | 0.02768 | 31.4917 | 0.00087896 |
| Macedonia | Vevčani | 0.000002 | 0.00228 | 0.00087719 |
| Macedonia | Čaška | 0.000068 | 0.081945 | 0.00082982 |
| Turkey | Elazığ | 0.000759 | 0.9383 | 0.00080891 |
| Mexico | San Luis Potosí | 0.004429 | 6.1137 | 0.00072444 |
| America | New Jersey | 0.001629 | 2.2591 | 0.00072108 |
| Macedonia | Rosoman | 0.000009 | 0.01329 | 0.0006772 |
| Macedonia | Čučer Sandevo | 0.000016 | 0.024078 | 0.00066451 |
| America | Arizona | 0.01881 | 29.5234 | 0.00063712 |
| Georgia | Ajaria | 0.00018 | 0.288 | 0.000625 |
| North Korea | Chagang-dongn | 0.00103 | 1.6613 | 0.00062 |
| Mexico | Baja California | 0.004326 | 7.145 | 0.00060546 |
| Mexico | Durango | 0.007185 | 12.3317 | 0.00058264 |
| Macedonia | Brvenica | 0.000009 | 0.01643 | 0.00054778 |
| America | Colorado | 0.01452 | 26.9601 | 0.00053857 |
| Kosovo | Mališevo | 0.000016 | 0.030642 | 0.00052216 |
| Kosovo | Štimlje | 0.000007 | 0.013442 | 0.00052076 |
| Turkey | Bingöl | 0.000414 | 0.8004 | 0.00051724 |
| Mexico | Chihuahua | 0.01255 | 24.7455 | 0.00050716 |
| Montenegro | Kolašin | 0.000045 | 0.0897 | 0.00050167 |
| Mexico | Distrito Federal | 0.000072 | 0.1458 | 0.00049383 |
| Mexico | Jalisco | 0.003845 | 7.8588 | 0.00048926 |
| Turkey | Aksaray | 0.000313 | 0.7659 | 0.00040867 |
| Turkey | Bayburt | 0.000153 | 0.3746 | 0.00040844 |
| Canada | Yukon | 0.0191 | 48.2443 | 0.0003959 |
| Kosovo | Obilić | 0.000004 | 0.010484 | 0.00038153 |
| Macedonia | Plasnica | 0.000002 | 0.005444 | 0.00036738 |
| Germany | Brandenburg | 0.00108 | 2.948029 | 0.00036635 |
| Macedonia | Bogovinje | 0.000005 | 0.014165 | 0.00035298 |
| America | West Virginia | 0.002199 | 6.2756 | 0.0003504 |
| North Korea | Rasŏn | 0.000026 | 0.0746 | 0.00034853 |
| America | Utah | 0.007148 | 21.9882 | 0.00032508 |
| Mexico | Quintana Roo | 0.001025 | 3.4205 | 0.00029966 |
| Macedonia | Vasilevo | 0.000006 | 0.02304 | 0.00026042 |
| China | Xinjiang | 0.0408 | 163.1585 | 0.00025006 |
| Mexico | Sonora | 0.004441 | 17.9355 | 0.00024761 |
| Turkey | Iğdır | 0.000089 | 0.3664 | 0.0002429 |
| Ukraine | Sevastopol' | 0.00937 | 38.587 | 0.00024283 |
| Germany | Bayern | 0.0017 | 7.055019 | 0.00024096 |
| Mexico | Nuevo León | 0.00149 | 6.4156 | 0.00023225 |
| Germany | Baden-Württemberg | 0.000829 | 3.575146 | 0.00023188 |
| Mexico | Querétaro | 0.000265 | 1.1699 | 0.00022652 |
| Mexico | Morelos | 0.000107 | 0.4879 | 0.00021931 |
| Turkey | Kinkkale | 0.000105 | 0.4791 | 0.00021916 |
| Japan | Hokkaido | 0.001701 | 8.3424 | 0.0002039 |
| Macedonia | Mogila | 0.000005 | 0.025562 | 0.0001956 |
| Macedonia | Vrapčište | 0.000003 | 0.015798 | 0.0001899 |
| Macedonia | Bosilovo | 0.000003 | 0.016199 | 0.0001852 |
| Canada | Prince Edward Island | 0.000102 | 0.566 | 0.00018021 |
| Turkey | Van | 0.000372 | 2.0921 | 0.00017781 |
| Mexico | Coahuila | 0.002681 | 15.1595 | 0.00017685 |
| Canada | Saskatchewan | 0.0109 | 65.1036 | 0.00016743 |
| America | Wisconsin | 0.00274 | 16.9635 | 0.00016152 |
| France | Nouvelle-Aquitaine | 0.00134 | 8.4036 | 0.00015946 |
| Canada | Newfoundland and Labrador | 0.00644 | 40.5212 | 0.00015893 |
| America | Ohio | 0.001804 | 11.6098 | 0.00015539 |
| Mexico | Guanajuato | 0.000472 | 3.0607 | 0.00015421 |
| Georgia | Samtskhe-Javakheti | 0.000097 | 0.6413 | 0.00015126 |
| Macedonia | Novo Selo | 0.000005 | 0.042482 | 0.0001177 |
| Mexico | Sinaloa | 0.000636 | 5.7365 | 0.00011087 |
| Kosovo | Novo Brdo | 0.000002 | 0.020398 | 9.8049E-05 |
| Canada | Manitoba | 0.00577 | 64.7797 | 8.9071E-05 |
| Mexico | Baja California Sur | 0.000605 | 7.3909 | 8.1857E-05 |
| America | Indiana | 0.000706 | 9.4326 | 7.4847E-05 |
| America | Illinois | 0.001082 | 14.9995 | 7.2136E-05 |
| Turkey | Van | 0.000037 | 0.5485 | 6.7457E-05 |
| Turkey | Nevsehir | 0.000037 | 0.5485 | 6.7457E-05 |
| Mexico | Aguascalientes | 0.000031 | 0.5618 | 5.518E-05 |
| America | Wyoming | 0.00124 | 25.3335 | 4.8947E-05 |
| Turkey | Mus | 0.000034 | 0.865 | 3.9306E-05 |
| China | Qinghai | 0.002046 | 69.6647 | 2.9369E-05 |
| Mexico | Zacatecas | 0.003847 | 157.9209 | 2.436E-05 |
| Macedonia | Dolneni | 0.000001 | 0.041243 | 2.4247E-05 |
| America | Minnesota | 0.000362 | 25.5163 | 1.4187E-05 |
| Turkey | Kirsehir | 0.000009 | 0.6584 | 1.367E-05 |
| Georgia | Abkhazia | 0.00001 | 0.866 | 1.1547E-05 |
| North Korea | Ryanggang | 0.000006 | 1.4317 | 4.1908E-06 |
| America | Kansas | 0.000074 | 21.31 | 3.4725E-06 |
| Georgia | Mtskheta-Mtianeti | 0.000001 | 0.6786 | 1.4736E-06 |
| Turkey | Agri | 0.000001 | 1.1099 | 9.0098E-07 |
| China | Xizang | 0.000092 | 120.2189 | 7.6527E-07 |
| Canada | Northwest Territories | 0.000014 | 134.6106 | 1.04E-07 |
| America | Alaska | 0 | 171.7854 | 0 |
| America | District of Columbia | 0 | 0.0177 | 0 |
| America | Hawaii | 0 | 2.8313 | 0 |
| America | Iowa | 0 | 14.5746 | 0 |
| America | Nebraska | 0 | 20.033 | 0 |
| America | Nevada | 0 | 28.638 | 0 |
| America | North Dakota | 0 | 18.3108 | 0 |
| America | South Dakota | 0 | 11.9729 | 0 |
| North Korea | Sinŭiju | 0 | 0.018 | 0 |
| Montenegro | Šavnik | 0 | 0.0553 | 0 |
| Macedonia | Čair | 0 | 0.000352 | 0 |
| Macedonia | Krivogaštani | 0 | 0.009357 | 0 |
| Macedonia | Tearce | 0 | 0.013654 | 0 |
| Georgia | Guria | 0 | 0.2033 | 0 |
| Georgia | Imereti | 0 | 0.6475 | 0 |
| Georgia | Kvemo Kartli | 0 | 0.6072 | 0 |
| Georgia | Racha-Lechkhumi-Kvemo Svaneti | 0 | 0.499 | 0 |
| Georgia | Samegrelo-Zemo Svaneti | 0 | 0.744 | 0 |
| Georgia | Shida Kartli | 0 | 0.5729 | 0 |
| Georgia | Tbilisi | 0 | 0.05042 | 0 |
| Canada | Nunavut | 0 | 209.319 | 0 |
| Kosovo | Srebrenica | 0 | 0.037437 | 0 |

| **Table S3 Taxonomic information of the 606 host species of the fall webworm** | | | | |
| --- | --- | --- | --- | --- |
| **Family** | |  | **Genus** | |
| Rosaceae | 65 |  | Prunus | 20 |
| Fabaceae | 36 |  | Quercus | 19 |
| Asteraceae | 29 |  | Acer | 16 |
| Fagaceae | 28 |  | Salix | 15 |
| Betulaceae | 28 |  | Populus | 12 |
| Salicaceae | 27 |  | Betula | 11 |
| Oleaceae | 25 |  | Cornus | 10 |
| Sapindaceae | 21 |  | Ulmus | 10 |
| Malvaceae | 19 |  | Fraxinus | 9 |
| Poaceae | 12 |  | Tilia | 9 |
| Ulmaceae | 12 |  | Alnus | 7 |
| Solanaceae | 11 |  | Rosa | 7 |
| Caprifoliaceae | 11 |  | Rhododendron | 6 |
| Cornaceae | 10 |  | Euonymus | 6 |
| Lamiaceae | 10 |  | Ilex | 5 |
| Moraceae | 10 |  | Lonicera | 5 |
| Amaranthaceae | 9 |  | Castanea | 5 |
| Apiaceae | 9 |  | Carpinus | 5 |
| Juglandaceae | 9 |  | Ribes | 4 |
| Polygonaceae | 8 |  | Syringa | 4 |
| Ericaceae | 8 |  | Ligustrum | 4 |
| Cannabaceae | 8 |  | Solanum | 4 |
| Brassicaceae | 8 |  | Weigela | 4 |
| Cupressaceae | 8 |  | Sambucus | 4 |
| Adoxaceae | 7 |  | Juglans | 4 |
| Celastraceae | 7 |  | Carya | 4 |
| Rhamnaceae | 6 |  | Corylus | 4 |
| Rutaceae | 6 |  | Celtis | 4 |
| Vitaceae | 6 |  | Morus | 4 |
| Lauraceae | 5 |  | Rubus | 4 |
| Arecaceae | 5 |  | Spiraea | 4 |
| Rubiaceae | 5 |  | Pyrus | 4 |
| Aquifoliaceae | 5 |  | Malus | 4 |
| Cucurbitaceae | 5 |  | Hibiscus | 4 |
| Grossulariaceae | 4 |  | Aesculus | 4 |
| Hydrangeaceae | 4 |  | Platanus | 3 |
| Bignoniaceae | 4 |  | Cinnamomum | 3 |
| Euphorbiaceae | 4 |  | Persicaria | 3 |
| Anacardiaceae | 4 |  | Diospyros | 3 |
| Platanaceae | 3 |  | Impatiens | 3 |
| Berberidaceae | 3 |  | Catalpa | 3 |
| Magnoliaceae | 3 |  | Plantago | 3 |
| Orchidaceae | 3 |  | Ipomoea | 3 |
| Commelinaceae | 3 |  | Viburnum | 3 |
| Ebenaceae | 3 |  | Arctium | 3 |
| Balsaminaceae | 3 |  | Crataegus | 3 |
| Plantaginaceae | 3 |  | Chaenomeles | 3 |
| Convolvulaceae | 3 |  | Lespedeza | 3 |
| Apocynaceae | 3 |  | Cercis | 3 |
| Thymelaeaceae | 3 |  | Brassica | 3 |
| Buxaceae | 2 |  | Citrus | 3 |
| Papaveraceae | 2 |  | Buxus | 2 |
| Asparagaceae | 2 |  | Berberis | 2 |
| Iridaceae | 2 |  | Magnolia | 2 |
| Amaryllidaceae | 2 |  | Allium | 2 |
| Paeoniaceae | 2 |  | Dendrobium | 2 |
| Primulaceae | 2 |  | Tradescantia | 2 |
| Polemoniaceae | 2 |  | Phoenix | 2 |
| Theaceae | 2 |  | Lolium | 2 |
| Nyssaceae | 2 |  | Paeonia | 2 |
| Paulowniaceae | 2 |  | Amaranthus | 2 |
| Elaeagnaceae | 2 |  | Chenopodium | 2 |
| Lythraceae | 2 |  | Polygonum | 2 |
| Geraniaceae | 2 |  | Phlox | 2 |
| Simaroubaceae | 2 |  | Camellia | 2 |
| Taxaceae | 2 |  | Philadelphus | 2 |
| Osmundaceae | 1 |  | Nyssa | 2 |
| Equisetaceae | 1 |  | Paulownia | 2 |
| Schisandraceae | 1 |  | Forsythia | 2 |
| Menispermaceae | 1 |  | Osmanthus | 2 |
| Ranunculaceae | 1 |  | Salvia | 2 |
| Lardizabalaceae | 1 |  | Lycium | 2 |
| Annonaceae | 1 |  | Eleutherococcus | 2 |
| Stemonaceae | 1 |  | Sonchus | 2 |
| Smilacaceae | 1 |  | Chrysanthemum | 2 |
| Cannaceae | 1 |  | Artemisia | 2 |
| Musaceae | 1 |  | Dahlia | 2 |
| Zingiberaceae | 1 |  | Helianthus | 2 |
| Cyperaceae | 1 |  | Erigeron | 2 |
| Daphniphyllaceae | 1 |  | Fagus | 2 |
| Crassulaceae | 1 |  | Elaeagnus | 2 |
| Cercidiphyllaceae | 1 |  | Humulus | 2 |
| Altingiaceae | 1 |  | Frangula | 2 |
| Hamamelidaceae | 1 |  | Broussonetia | 2 |
| Tamaricaceae | 1 |  | Maclura | 2 |
| Nyctaginaceae | 1 |  | Ficus | 2 |
| Phytolaccaceae | 1 |  | Fragaria | 2 |
| Caryophyllaceae | 1 |  | Cucurbita | 2 |
| Portulacaceae | 1 |  | Wisteria | 2 |
| Cactaceae | 1 |  | Trifolium | 2 |
| Symplocaceae | 1 |  | Gleditsia | 2 |
| Actinidiaceae | 1 |  | Daphne | 2 |
| Styracaceae | 1 |  | Gossypium | 2 |
| Sapotaceae | 1 |  | Rhus | 2 |
| Garryaceae | 1 |  | Parthenocissus | 2 |
| Eucommiaceae | 1 |  | Chamaecyparis | 2 |
| Pedaliaceae | 1 |  | Juniperus | 2 |
| Scrophulariaceae | 1 |  | Osmunda | 1 |
| Gesneriaceae | 1 |  | Equisetum | 1 |
| Boraginaceae | 1 |  | Illicium | 1 |
| Oxalidaceae | 1 |  | Macleaya | 1 |
| Myricaceae | 1 |  | Papaver | 1 |
| Phyllanthaceae | 1 |  | Pachygone | 1 |
| Begoniaceae | 1 |  | Nandina | 1 |
| Staphyleaceae | 1 |  | Clematis | 1 |
| Myrtaceae | 1 |  | Akebia | 1 |
| Resedaceae | 1 |  | Lindera | 1 |
| Tropaeolaceae | 1 |  | Sassafras | 1 |
| Meliaceae | 1 |  | Liriodendron | 1 |
|  |  |  | Asimina | 1 |
|  |  |  | Stemona | 1 |
|  |  |  | Smilax | 1 |
|  |  |  | Aloe | 1 |
|  |  |  | Asparagus | 1 |
|  |  |  | Gladiolus | 1 |
|  |  |  | Iris | 1 |
|  |  |  | Bletilla | 1 |
|  |  |  | Canna | 1 |
|  |  |  | Musa | 1 |
|  |  |  | Zingiber | 1 |
|  |  |  | Commelina | 1 |
|  |  |  | Caryota | 1 |
|  |  |  | Rhapis | 1 |
|  |  |  | Howea | 1 |
|  |  |  | Elymus | 1 |
|  |  |  | Hordeum | 1 |
|  |  |  | Arrhenatherum | 1 |
|  |  |  | Alopecurus | 1 |
|  |  |  | Zoysia | 1 |
|  |  |  | Setaria | 1 |
|  |  |  | Cenchrus | 1 |
|  |  |  | Panicum | 1 |
|  |  |  | Miscanthus | 1 |
|  |  |  | Zea | 1 |
|  |  |  | Cyperus | 1 |
|  |  |  | Daphniphyllum | 1 |
|  |  |  | Hylotelephium | 1 |
|  |  |  | Cercidiphyllum | 1 |
|  |  |  | Liquidambar | 1 |
|  |  |  | Hamamelis | 1 |
|  |  |  | Tamarix | 1 |
|  |  |  | Achyranthes | 1 |
|  |  |  | Mirabilis | 1 |
|  |  |  | Phytolacca | 1 |
|  |  |  | Stellaria | 1 |
|  |  |  | Portulaca | 1 |
|  |  |  | Schlumbergera | 1 |
|  |  |  | Beta | 1 |
|  |  |  | Bassia | 1 |
|  |  |  | Dysphania | 1 |
|  |  |  | Spinacia | 1 |
|  |  |  | Rumex | 1 |
|  |  |  | Rheum | 1 |
|  |  |  | Fagopyrum | 1 |
|  |  |  | Symplocos | 1 |
|  |  |  | Ardisia | 1 |
|  |  |  | Primula | 1 |
|  |  |  | Actinidia | 1 |
|  |  |  | Styrax | 1 |
|  |  |  | Sideroxylon | 1 |
|  |  |  | Enkianthus | 1 |
|  |  |  | Pieris | 1 |
|  |  |  | Deutzia | 1 |
|  |  |  | Hydrangea | 1 |
|  |  |  | Aucuba | 1 |
|  |  |  | Eucommia | 1 |
|  |  |  | Sesamum | 1 |
|  |  |  | Campsis | 1 |
|  |  |  | Verbascum | 1 |
|  |  |  | Jasminum | 1 |
|  |  |  | Abeliophyllum | 1 |
|  |  |  | Chionanthus | 1 |
|  |  |  | Olea | 1 |
|  |  |  | Callicarpa | 1 |
|  |  |  | Stachys | 1 |
|  |  |  | Leonurus | 1 |
|  |  |  | Lamium | 1 |
|  |  |  | Marrubium | 1 |
|  |  |  | Perilla | 1 |
|  |  |  | Isodon | 1 |
|  |  |  | Coleus | 1 |
|  |  |  | Streptocarpus | 1 |
|  |  |  | Petunia | 1 |
|  |  |  | Nicotiana | 1 |
|  |  |  | Alkekengi | 1 |
|  |  |  | Datura | 1 |
|  |  |  | Capsicum | 1 |
|  |  |  | Periploca | 1 |
|  |  |  | Nerium | 1 |
|  |  |  | Catharanthus | 1 |
|  |  |  | Paederia | 1 |
|  |  |  | Serissa | 1 |
|  |  |  | Cephalanthus | 1 |
|  |  |  | Gardenia | 1 |
|  |  |  | Coffea | 1 |
|  |  |  | Anchusa | 1 |
|  |  |  | Zabelia | 1 |
|  |  |  | Symphoricarpos | 1 |
|  |  |  | Dendropanax | 1 |
|  |  |  | Aralia | 1 |
|  |  |  | Fatsia | 1 |
|  |  |  | Cryptotaenia | 1 |
|  |  |  | Apium | 1 |
|  |  |  | Petroselinum | 1 |
|  |  |  | Daucus | 1 |
|  |  |  | Taraxacum | 1 |
|  |  |  | Cichorium | 1 |
|  |  |  | Lactuca | 1 |
|  |  |  | Carduus | 1 |
|  |  |  | Cirsium | 1 |
|  |  |  | Gynura | 1 |
|  |  |  | Petasites | 1 |
|  |  |  | Galinsoga | 1 |
|  |  |  | Eupatorium | 1 |
|  |  |  | Cosmos | 1 |
|  |  |  | Bidens | 1 |
|  |  |  | Zinnia | 1 |
|  |  |  | Ambrosia | 1 |
|  |  |  | Callistephus | 1 |
|  |  |  | Oxalis | 1 |
|  |  |  | Celastrus | 1 |
|  |  |  | Pterocarya | 1 |
|  |  |  | Lithocarpus | 1 |
|  |  |  | Castanopsis | 1 |
|  |  |  | Morella | 1 |
|  |  |  | Ostrya | 1 |
|  |  |  | Hemiptelea | 1 |
|  |  |  | Zelkova | 1 |
|  |  |  | Aphananthe | 1 |
|  |  |  | Cannabis | 1 |
|  |  |  | Ziziphus | 1 |
|  |  |  | Rhamnus | 1 |
|  |  |  | Berchemia | 1 |
|  |  |  | Rhamnella | 1 |
|  |  |  | Potentilla | 1 |
|  |  |  | Agrimonia | 1 |
|  |  |  | Sobarria | 1 |
|  |  |  | Kerria | 1 |
|  |  |  | Cotoneaster | 1 |
|  |  |  | Scandosorbus | 1 |
|  |  |  | Pyracantha | 1 |
|  |  |  | Pourthiaea | 1 |
|  |  |  | Sorbus | 1 |
|  |  |  | Amelanchier | 1 |
|  |  |  | Mespilus | 1 |
|  |  |  | Cydonia | 1 |
|  |  |  | Alniaria | 1 |
|  |  |  | Eriobotrya | 1 |
|  |  |  | Mallotus | 1 |
|  |  |  | Ricinus | 1 |
|  |  |  | Mercurialis | 1 |
|  |  |  | Euphorbia | 1 |
|  |  |  | Securinega | 1 |
|  |  |  | Begonia | 1 |
|  |  |  | Trichosanthes | 1 |
|  |  |  | Luffa | 1 |
|  |  |  | Cucumis | 1 |
|  |  |  | Styphnolobium | 1 |
|  |  |  | Amorpha | 1 |
|  |  |  | Arachis | 1 |
|  |  |  | Laburnum | 1 |
|  |  |  | Wisteriopsis | 1 |
|  |  |  | Pueraria | 1 |
|  |  |  | Lablab | 1 |
|  |  |  | Vigna | 1 |
|  |  |  | Phaseolus | 1 |
|  |  |  | Glycine | 1 |
|  |  |  | Lotus | 1 |
|  |  |  | Robinia | 1 |
|  |  |  | Colutea | 1 |
|  |  |  | Caragana | 1 |
|  |  |  | Lathyrus | 1 |
|  |  |  | Vicia | 1 |
|  |  |  | Pisum | 1 |
|  |  |  | Melilotus | 1 |
|  |  |  | Medicago | 1 |
|  |  |  | Senna | 1 |
|  |  |  | Gymnocladus | 1 |
|  |  |  | Albizia | 1 |
|  |  |  | Adenanthera | 1 |
|  |  |  | Acacia | 1 |
|  |  |  | Staphylea | 1 |
|  |  |  | Lagerstroemia | 1 |
|  |  |  | Punica | 1 |
|  |  |  | Psidium | 1 |
|  |  |  | Geranium | 1 |
|  |  |  | Pelargonium | 1 |
|  |  |  | Reseda | 1 |
|  |  |  | Tropaeolum | 1 |
|  |  |  | Lepidium | 1 |
|  |  |  | Erysimum | 1 |
|  |  |  | Diplotaxis | 1 |
|  |  |  | Raphanus | 1 |
|  |  |  | Armoracia | 1 |
|  |  |  | Wikstroemia | 1 |
|  |  |  | Firmiana | 1 |
|  |  |  | Abelmoschus | 1 |
|  |  |  | Alcea | 1 |
|  |  |  | Abutilon | 1 |
|  |  |  | Toona | 1 |
|  |  |  | Toxicodendron | 1 |
|  |  |  | Cotinus | 1 |
|  |  |  | Ailanthus | 1 |
|  |  |  | Picrasma | 1 |
|  |  |  | Koelreuteria | 1 |
|  |  |  | Zanthoxylum | 1 |
|  |  |  | Tetradium | 1 |
|  |  |  | Phellodendron | 1 |
|  |  |  | Nekemias | 1 |
|  |  |  | Ampelopsis | 1 |
|  |  |  | Causonis | 1 |
|  |  |  | Vitis | 1 |
|  |  |  | Torreya | 1 |
|  |  |  | Taxus | 1 |
|  |  |  | Taxodium | 1 |
|  |  |  | Metasequoia | 1 |
|  |  |  | Cryptomeria | 1 |
|  |  |  | Thuja | 1 |

| **Table S4 Forest type of the host plant** | | | | | |
| --- | --- | --- | --- | --- | --- |
| **arboreal species** | **Windbreak forests** | **Timber forest** | **Non-wood product forests** | **Fuelwood forests** | **Special-purpose forests** |
| 421 | 176 | 155 | 305 | 66 | 288 |

| **Table S5 Inter-species correlation between the fall webworm and its 109 host Families** | | | | | |
| --- | --- | --- | --- | --- | --- |
| **Family** | **AC** | **Pearson** | **genus** | **AC** | **Pearson** |
| Asteraceae | 0.9880809 | 0.3727304 | Helianthus | 0.84933 | 0.4594139 |
| Erigeron | 0.7332995 | 0.5524215 |
| Cichorium | 0.7077582 | 0.4174461 |
| Cirsium | 0.6649062 | 0.3584118 |
| Artemisia | 0.5973173 | 0.36302 |
| Ambrosia | 0.5465381 | 0.5560425 |
| Sonchus | 0.5297 | 0.2689932 |
| Cosmos | 0.4605909 | 0.407062 |
| Bidens | 0.4352748 | 0.4257497 |
| Arctium | 0.3875557 | 0.301334 |
| Lactuca | 0.3470389 | 0.2697047 |
| Galinsoga | 0.2644108 | 0.1913932 |
| Carduus | 0.2418868 | 0.224873 |
| Zinnia | 0.1547398 | 0.1434305 |
| Petasites | 0.1329079 | 0.1764751 |
| Chrysanthemum | 0.06695736 | 0.09443291 |
| Dahlia | 0.06069095 | 0.07534551 |
| Taraxacum | 0.04829674 | 0.1032473 |
| Eupatorium | 0.02694664 | 0.0503259 |
| Gynura | 0.006178954 | 0.01517459 |
| Callistephus | 0.00201583 | 0.02219559 |
| Fabaceae | 0.9829169 | 0.3424 | Trifolium | 0.9241679 | 0.4203678 |
| Medicago | 0.7432071 | 0.3937102 |
| Melilotus | 0.7421009 | 0.4553772 |
| Robinia | 0.7077422 | 0.4884447 |
| Lotus | 0.6408674 | 0.3922064 |
| Amorpha | 0.592299 | 0.5196866 |
| Gleditsia | 0.5807582 | 0.4907862 |
| Cercis | 0.5084611 | 0.4785428 |
| Lespedeza | 0.3872166 | 0.2974061 |
| Caragana | 0.2764961 | 0.1798471 |
| Pueraria | 0.2733937 | 0.2989917 |
| Pisum | 0.2633921 | 0.1956376 |
| Gymnocladus | 0.2512059 | 0.4566166 |
| Glycine | 0.2254744 | 0.2092005 |
| Lathyrus | 0.1905626 | 0.1755062 |
| Phaseolus | 0.1567074 | 0.1154974 |
| Styphnolobium | 0.1262968 | 0.1796007 |
| Laburnum | 0.1174935 | 0.1519275 |
| Wisteria | 0.1170063 | 0.2533338 |
| Vicia | 0.1149551 | 0.09176043 |
| Colutea | 0.1084915 | 0.1473078 |
| Arachis | 0.09342499 | 0.07313033 |
| Albizia | 0.04696646 | 0.1636107 |
| Senna | 0.01719704 | 0.02837547 |
| Dolichos | 0.01579725 | 0.03900538 |
| Wisteriopsis | 0.009075155 | 0.04646453 |
| Acacia | 0.00457373 | 0.0127484 |
| Vigna | 0.003893775 | 0.02395302 |
| Adenanthera | 0.00095364 | 0.001776935 |
| Rosaceae | 0.9754089 | 0.3984732 | Prunus | 0.9260281 | 0.4518342 |
| Rosa | 0.6266288 | 0.3887495 |
| Pyrus | 0.6001201 | 0.4224792 |
| Fragaria | 0.5107869 | 0.3111211 |
| Rubus | 0.3734637 | 0.2706961 |
| Chaenomeles | 0.3675854 | 0.3527977 |
| Crataegus | 0.2971536 | 0.2338301 |
| Kerria | 0.2781989 | 0.311323 |
| Spiraea | 0.242081 | 0.2025223 |
| Cydonia | 0.2191558 | 0.2043534 |
| Malus | 0.2011346 | 0.2523838 |
| Amelanchier | 0.180193 | 0.3824217 |
| Eriobotrya | 0.1679322 | 0.1461876 |
| Agrimonia | 0.1616793 | 0.1406035 |
| Potentilla | 0.08276841 | 0.1230941 |
| Mespilus | 0.07052195 | 0.101794 |
| Alniaria | 0.04706151 | 0.09817792 |
| Sorbus | 0.02915826 | 0.08047107 |
| Pourthiaea | 0.02902314 | 0.07809781 |
| Pyracantha | 0.02738374 | 0.05412317 |
| Cotoneaster | 0.02300075 | 0.06892678 |
| Scandosorbus | 0.01719704 | 0.0282847 |
| Sobarria | 0.001054103 | 0.03289996 |
| Salicaceae | 0.9675317 | 0.4170719 | Salix | 0.7986945 | 0.3892843 |
| Populus | 0.9101975 | 0.4481378 |
| Sapindaceae | 0.9368007 | 0.4910757 | Acer | 0.9267522 | 0.4924164 |
| Aesculus | 0.5158706 | 0.4235325 |
| Koelreuteria | 0.3275471 | 0.3824207 |
| Polygonaceae | 0.9109283 | 0.3653286 | Rumex | 0.8775018 | 0.3607181 |
| Fagopyrum | 0.3940467 | 0.2939959 |
| Persicaria | 0.2941973 | 0.2625141 |
| Polygonaceae | 0.2798572 | 0.3030045 |
| Rheum | 0.000745686 | 0.004930994 |
| Plantaginaceae | 0.9084542 | 0.3896425 | Plantago | 0.9084542 | 0.3896425 |
| Poaceae | 0.8919275 | 0.3046258 | Lolium | 0.6092273 | 0.3642836 |
| Cenchrus | 0.6000492 | 0.3712621 |
| Setaria | 0.5136543 | 0.3830931 |
| Zea | 0.4812211 | 0.255468 |
| Panicum | 0.3692694 | 0.2895409 |
| Alopecurus | 0.3219247 | 0.2212897 |
| Hordeum | 0.3200274 | 0.1871564 |
| Miscanthus | 0.3038506 | 0.3142762 |
| Arrhenatherum | 0.273907 | 0.2377327 |
| Elymus | 0.1815793 | 0.2426113 |
| Zoysia | 0.06060816 | 0.1424149 |
| Oleaceae | 0.8540737 | 0.4363924 | Fraxinus | 0.6591187 | 0.4514488 |
| Syringa | 0.6496028 | 0.4532174 |
| Chionanthus | 0.2442481 | 0.4873877 |
| Forsythia | 0.1895056 | 0.2621622 |
| Osmanthus | 0.07031833 | 0.1220295 |
| Olea | 0.06399267 | 0.05832714 |
| Jasminum | 0.03608991 | 0.06345438 |
| Abeliophyllum | 0.01673295 | 0.1035619 |
| Betulaceae | 0.8513214 | 0.3999231 | Betula | 0.6621577 | 0.365288 |
| Alnus | 0.5565434 | 0.3408643 |
| Carpinus | 0.5063464 | 0.4232378 |
| Corylus | 0.4659798 | 0.3287231 |
| Ostrya | 0.4167187 | 0.5642433 |
| Geraniaceae | 0.8220687 | 0.3741412 | Geranium | 0.8221158 | 0.3748824 |
| Pelargonium | 0.007680845 | 0.02098549 |
| Vitaceae | 0.8072979 | 0.4877044 | Parthenocissus | 0.7592323 | 0.5556832 |
| Vitis | 0.2012888 | 0.1774502 |
| Causonis | 0.05367182 | 0.08032724 |
| Ampelopsis | 0.04463292 | 0.1441355 |
| Nekemias | 0.02949722 | 0.1669896 |
| Amaranthaceae | 0.789937 | 0.3723369 | Amaranthus | 0.6319092 | 0.3708639 |
| Chenopodium | 0.334679 | 0.2771657 |
| Bassia | 0.2847677 | 0.2838802 |
| Beta | 0.1779788 | 0.140576 |
| Dysphania | 0.1351493 | 0.1578001 |
| Spinacia | 0.1072 | 0.1340149 |
| Achyranthes | 0.06396949 | 0.2107524 |
| Ulmaceae | 0.7890129 | 0.4941476 | Ulmus | 0.7869456 | 0.4976685 |
| Zelkova | 0.09472152 | 0.1804661 |
| Hemiptelea | 0.02529396 | 0.07951261 |
| Cannabaceae | 0.778391 | 0.3986191 | Humulus | 0.6355945 | 0.3921758 |
| Celtis | 0.4941493 | 0.4322512 |
| Cannabis | 0.3658758 | 0.2515191 |
| Aphananthe | 0.02316684 | 0.07309136 |
| Apiaceae | 0.7736967 | 0.4359442 | Daucus | 0.7122853 | 0.4429288 |
| Cryptotaenia | 0.3212266 | 0.513625 |
| Apium | 0.1327105 | 0.1212808 |
| Aralia | 0.1019512 | 0.1507019 |
| Fatsia | 0.07930205 | 0.1434277 |
| Eleutherococcus | 0.01950378 | 0.08208646 |
| Dendropanax | 0.01904925 | 0.0638297 |
| Petroselinum | 0.006233081 | 0.05581499 |
| Fagaceae | 0.7695582 | 0.4411442 | Quercus | 0.7589048 | 0.446055 |
| Castanea | 0.4113432 | 0.3796646 |
| Castanopsis | 0.01712007 | 0.06282688 |
| Lithocarpus | 0.01312704 | 0.05651203 |
| Fagus | 0.005209428 | 0.05407065 |
| Caprifoliaceae | 0.7406784 | 0.4269229 | Lonicera | 0.6206834 | 0.3799897 |
| Symphoricarpos | 0.2675831 | 0.3018338 |
| Weigela | 0.09612243 | 0.1493674 |
| Zabelia | 0.002031232 | 0.02388354 |
| Malvaceae | 0.7178366 | 0.3422819 | Tilia | 0.6141403 | 0.4253592 |
| Hibiscus | 0.5285908 | 0.4295325 |
| Firmiana | 0.1310179 | 0.2426521 |
| Gossypium | 0.1250702 | 0.08491788 |
| Alcea | 0.03853357 | 0.1423736 |
| Abutilon | 0.02069519 | 0.09434004 |
| Abelmoschus | 0.003863018 | 0.02297239 |
| Cornaceae | 0.7142643 | 0.4412243 | Cornus | 0.7142643 | 0.4412243 |
| Solanaceae | 0.7109349 | 0.2995068 | Datura | 0.5396064 | 0.3297449 |
| Capsicum | 0.1516515 | 0.1166197 |
| Lycium | 0.1099812 | 0.1337917 |
| Nicotiana | 0.1051529 | 0.08925897 |
| Alkekengi | 0.05787394 | 0.1052829 |
| Petunia | 0.05447092 | 0.1121006 |
| Solanum | 0.05447092 | 0.1121006 |
| Cupressaceae | 0.7090256 | 0.4977536 | Taxodium | 0.3979144 | 0.4334854 |
| Thuja | 0.3926814 | 0.4041195 |
| Metasequoia | 0.1303979 | 0.2234051 |
| Juniperus | 0.1047504 | 0.1490513 |
| Cryptomeria | 0.07866571 | 0.1099596 |
| Chamaecyparis | 0.06428952 | 0.1356584 |
| Lamiaceae | 0.701606 | 0.3916112 | Callicarpa | 0.04467857 | 0.09006034 |
| Coleus | 0.02984066 | 0.03593911 |
| Isodon | 0.000992435 | 0.01350721 |
| Lamium | 0.5619595 | 0.4204525 |
| Leonurus | 0.3444945 | 0.3663938 |
| Marrubium | 0.000853654 | 0.007093273 |
| Perilla | 0.4021152 | 0.4353264 |
| Stachys | 0.09773428 | 0.1161674 |
| Equisetaceae | 0.692116 | 0.3220347 | Equisetum | 0.692116 | 0.3220347 |
| Juglandaceae | 0.6901704 | 0.4796091 | Juglans | 0.6509544 | 0.4620229 |
| Carya | 0.3786784 | 0.5585473 |
| Pterocarya | 0.01835756 | 0.07337077 |
| Moraceae | 0.6823928 | 0.3668536 | Broussonetia | 0.3434338 | 0.2981038 |
| Ficus | 0.3621952 | 0.2549011 |
| Maclura | 0.4548315 | 0.4469368 |
| Morus | 0.6323528 | 0.4138014 |
| Brassicaceae | 0.6820107 | 0.3682539 | Armoracia | 0.4263644 | 0.3354102 |
| Brassica | 0.3403618 | 0.2550149 |
| Diplotaxis | 0.173046 | 0.1810055 |
| Erysimum | 0.01496894 | 0.0387099 |
| Lepidium | 0.1772722 | 0.2055824 |
| Raphanus | 0.1845469 | 0.1736068 |
| Elaeagnaceae | 0.6783717 | 0.4546351 | Elaeagnus | 0.6783717 | 0.4546351 |
| Asparagaceae | 0.649791 | 0.4139724 |  |  |  |
| Scrophulariaceae | 0.6424014 | 0.463115 |  |  |  |
| Bignoniaceae | 0.623468 | 0.532225 |  |  |  |
| Simaroubaceae | 0.5501825 | 0.4174745 |  |  |  |
| Berberidaceae | 0.5461195 | 0.442041 |  |  |  |
| Celastraceae | 0.5227848 | 0.3986141 |  |  |  |
| Platanaceae | 0.5144698 | 0.5028931 |  |  |  |
| Commelinaceae | 0.4998757 | 0.4462247 |  |  |  |
| Rubiaceae | 0.4987192 | 0.4011489 |  |  |  |
| Grossulariaceae | 0.486492 | 0.3254841 |  |  |  |
| Polemoniaceae | 0.4680029 | 0.4992198 |  |  |  |
| Cucurbitaceae | 0.4676299 | 0.2885692 |  |  |  |
| Taxaceae | 0.4608073 | 0.3898108 |  |  |  |
| Magnoliaceae | 0.4186619 | 0.4628314 |  |  |  |
| Ebenaceae | 0.3997469 | 0.4004822 |  |  |  |
| Altingiaceae | 0.3976128 | 0.4585129 |  |  |  |
| Convolvulaceae | 0.3965875 | 0.2537663 |  |  |  |
| Nyctaginaceae | 0.3794292 | 0.2499827 |  |  |  |
| Euphorbiaceae | 0.3717603 | 0.1846928 |  |  |  |
| Aquifoliaceae | 0.3701742 | 0.3272825 |  |  |  |
| Paulowniaceae | 0.3607866 | 0.3850315 |  |  |  |
| Hamamelidaceae | 0.3597633 | 0.5617821 |  |  |  |
| Lauraceae | 0.3585897 | 0.384172 |  |  |  |
| Rutaceae | 0.350922 | 0.3508586 |  |  |  |
| Hydrangeaceae | 0.342803 | 0.2893206 |  |  |  |
| Adoxaceae | 0.3219632 | 0.2356221 |  |  |  |
| Annonaceae | 0.2951324 | 0.5268487 |  |  |  |
| Lythraceae | 0.283506 | 0.197803 |  |  |  |
| Staphyleaceae | 0.2653314 | 0.4947663 |  |  |  |
| Tropaeolaceae | 0.2583573 | 0.2147105 |  |  |  |
| Apocynaceae | 0.2468906 | 0.1707726 |  |  |  |
| Papaveraceae | 0.2380253 | 0.2085511 |  |  |  |
| Balsaminaceae | 0.2145983 | 0.1504559 |  |  |  |
| Amaryllidaceae | 0.2005377 | 0.2032427 |  |  |  |
| Portulacaceae | 0.1947106 | 0.1950354 |  |  |  |
| Rhamnaceae | 0.1919192 | 0.2318915 |  |  |  |
| Cyperaceae | 0.1898191 | 0.1660246 |  |  |  |
| Lardizabalaceae | 0.1841681 | 0.2819294 |  |  |  |
| Buxaceae | 0.1726867 | 0.1872361 |  |  |  |
| Ericaceae | 0.1686964 | 0.2115498 |  |  |  |
| Garryaceae | 0.1523895 | 0.221284 |  |  |  |
| Sapotaceae | 0.1513915 | 0.3306852 |  |  |  |
| Ranunculaceae | 0.1467512 | 0.1589255 |  |  |  |
| Boraginaceae | 0.138627 | 0.154041 |  |  |  |
| Nyssaceae | 0.1034015 | 0.3170423 |  |  |  |
| Theaceae | 0.09934845 | 0.1225722 |  |  |  |
| Cannaceae | 0.0913604 | 0.1173883 |  |  |  |
| Cercidiphyllaceae | 0.08243214 | 0.1715413 |  |  |  |
| Anacardiaceae | 0.07149169 | 0.001779945 |  |  |  |
| Begoniaceae | 0.07130711 | 0.07950671 |  |  |  |
| Iridaceae | 0.06834215 | 0.1206324 |  |  |  |
| Paeoniaceae | 0.06756618 | 0.1000413 |  |  |  |
| Resedaceae | 0.06725476 | 0.07140931 |  |  |  |
| Styracaceae | 0.06414542 | 0.1146762 |  |  |  |
| Pedaliaceae | 0.06011222 | 0.06558834 |  |  |  |
| Phytolaccaceae | 0.05772131 | 0.09180992 |  |  |  |
| Oxalidaceae | 0.04675486 | 0.05489388 |  |  |  |
| Eucommiaceae | 0.04629849 | 0.1017935 |  |  |  |
| Arecaceae | 0.04553681 | 0.06041544 |  |  |  |
| Orchidaceae | 0.0413396 | 0.08194652 |  |  |  |
| Meliaceae | 0.03811902 | 0.07585982 |  |  |  |
| Menispermaceae | 0.03811902 | 0.02974874 |  |  |  |
| Myricaceae | 0.03664523 | 0.1559523 |  |  |  |
| Primulaceae | 0.03600183 | 0.07186388 |  |  |  |
| Smilacaceae | 0.03514996 | 0.06265315 |  |  |  |
| Thymelaeaceae | 0.03419169 | 0.05549149 |  |  |  |
| Osmundaceae | 0.03407552 | 0.06075761 |  |  |  |
| Phyllanthaceae | 0.02993651 | 0.06288316 |  |  |  |
| Daphniphyllaceae | 0.02905886 | 0.06303411 |  |  |  |
| Schisandraceae | 0.02429825 | 0.07854772 |  |  |  |
| Myrtaceae | 0.02263432 | 0.01595202 |  |  |  |
| Musaceae | 0.01707451 | 0.06150519 |  |  |  |
| Zingiberaceae | 0.01455221 | 0.02548501 |  |  |  |
| Crassulaceae | 0.01043558 | 0.07865762 |  |  |  |
| Tamaricaceae | 0.009044553 | 0.04497553 |  |  |  |
| Caryophyllaceae | 0.007149552 | 0.04717784 |  |  |  |
| Gesneriaceae | 0.006033638 | 0.03750625 |  |  |  |
| Stemonaceae | 0.002777658 | 0.01605095 |  |  |  |
| Actinidiaceae | 0.001164421 | 0.002490007 |  |  |  |
| Cactaceae | 0.000977017 | 0.01245414 |  |  |  |
| Symplocaceae | -1 | -0.00082327 |  |  |  |

| **Table S6 World's important ecological projects** | | | | | | | |
| --- | --- | --- | --- | --- | --- | --- | --- |
| **Project Name** | | **Project Time** | **Afforestation (103 km2)** | **Project Cost** | **Distribution of the Project** | **Number of trees planted (million trees)** | **Main tree species** |
| "The Prairie State Forestry Project" in USA | | 1935-1986 | 6.5 | 528 million USD | North Dakota, South Dakota, Nebraska, Kansas, Oklahoma, and Texas | 217 | Styphnolobium, Populus, Ulmus |
| "Stalin's Rebuilding-Nature Plan" of Former Soviet Union | | 1949-1986 | 56.3 | - | Saratov-Astrakhan, Pinsk-Yekaterinovka-Kaminsk, Kamyshin-Stalingrad, Shchaboyansk-Vladiminovka, Stalingrad-Cherkessk, Vishnevaya Mountain-Caspian Sea, Voronezh-Rostov, Belgorod-Don River | - | Robinia, Acer, Betula, Populus, Ameniaca, Ulmus, Quercus, Pinus |
| Japan's Mountain Renovating Plan | | 1960-2020 | 103.9 | 12.8 trillion JPY | Japan | - | Chamaecyparis, Cryptomeria |
| Forestry Ecological Project in France | | 1965-2020 | 30 | - | France | - | Quercus, Populus, Fagus, Pinus, Pseudotsuga |
| The Green Dam Project | | 1970－1990 | 6 | - | Morocco, Algeria, Tunisia, Libya, Egypt | 7000 | Acacia, Quercus, Cupressus, Pinus |
| Mountain - Renovating and Country Green Plan in South Korea | | 1973-1998 | 24.8 | - | South Korea | - | Quercus, Castanea, Betula, Zelkova, Camelia, Cinnamomum, Pinus |
| India's Social Forestry Plan | | 1973-2020 | 599 | 345.7 million USD | 17 states of Indea | - | Acacia, Tectona, Eucalypus |
| Important Forestry Ecological Engineering in China | Three-North Shelterbelt Forest Program | 1978-2020 | 301.4 | 107.736 billion CYN | China | - | Populus, Ulmus, Betula, Robina, Paulownia, Tamarix, Eucalyptus, Pinus |
| Coastal Protection Forest Project | 1988-2020 | 83.2 |
| Yangtze Basin Protection Forest Project | 1989-2020 | 118.4 |
| Natural Forest Conservation Program | 1998-2020 | 204 |
| Grain for Green Program | 1999-2020 | 348 |
| The National Greening Program in Philippines | | 1987-2020 | 41 | - | Philippines | - | Cocos, Hevea, Dipterocarpus |
| Canada's Green Plan | | 1990-2000 | 40 | 3 billion CAD | Cnanda | 325 | Quercus, Acer, Pinus, Picea |
| Great Green Wall Plan | | 2008-2020 | 40 | - | Senegal, Mauritania, Mali, Burkina Faso, Nigeria, Niger, Chad, Sudan, Ethiopia, Eritrea, and Djibouti | - | Acacia, Balanites, Ziziphus |
| Bonn Challenge | | 2011-2030 | 1500 | - | Argentina, Armenia, Azerbaijan, Bangladesh, Belize, Benin, Brazil, Burkina Faso, Burundi, Cameroon, Canada, Central African Republic, Chad, Chile, Colombia, Costa Rica, Côte d'Ivoire, Cuba, Democratic Republic of the Congo, Dominican Republic, Ecuador, El Salvador, Eswatini, Ethiopia, France SUD, Gambia, Georgia, Ghana, Guatemala, Guinea, Honduras, Iceland, India, Kazakhstan, Kenya, Kyrgyzstan, Liberia, Madagascar, Malawi, Mali, Mexico, Mexico, Mongolia, Montenegro, Mozambique, Nicaragua, Niger, Nigeria, North Macedonia, Pakistan, Panama, Peru, Republic of Sudan, Republic of the Congo, Rwanda, Scotland, Senegal, Sierra Leone, Slovenia, South Africa, Sri Lanka, Tajikistan, Tanzania, Togo, Turkey, Uganda, Ukraine, United States of America, Uruguay, Uzbekistan, Zimbabwe | - | Tectona, Shorea, Acacia, Pinus, Picea |
| *data from "World's Important Ecological Engineerings" ISBN:978-7-03-020677-0, Development of key ecological conservation and restoration projects in the past century (https://doi.org/10.1016/j.ecofro.2024.09.006) and Bonn Challenge (https://www.bonnchallenge.org/) | | | | | |  |  |

| **Comprehensive Threat Index (CTI) of fall webworm to world's important ecological projects** | | | | | | | | | | | | | |
| --- | --- | --- | --- | --- | --- | --- | --- | --- | --- | --- | --- | --- | --- |
| Species | AC Index | **Stage Ⅰ** | | **Stage Ⅱ** | | | | | | | **Stage Ⅲ** | | |
| "The Prairie State Forestry Project" in USA | "Stalin's Rebuilding-Nature Plan" of Former Soviet Union | Japan's Mountain Renovating Plan | Forestry Ecological Project in France | The Green Dam Project | Mountain - Renovating and Country Green Plan in South Korea | India's Social Forestry Plan | Important Forestry Ecological Engineering in China | The National Greening Program in Philippines | Canada's Green Plan | Great Green Wall Plan | Bonn Challenge |
| Acer | 0.9268 |  | P |  |  |  |  |  |  |  | P |  |  |
| Prunus | 0.9260 |  | P |  |  |  |  |  |  |  |  |  |  |
| Populus | 0.9102 | P | P |  | P |  |  |  | P |  |  |  |  |
| Ulmus | 0.7869 | P | P |  |  |  |  |  | P |  |  |  |  |
| Quercus | 0.7589 |  | P |  | P | P | P |  |  |  | P |  |  |
| Robinia | 0.7077 |  | P |  |  |  |  |  | P |  |  |  |  |
| Betula | 0.6622 |  | P |  |  |  | P |  | P |  |  |  |  |
| Castanea | 0.4113 |  |  |  |  |  | P |  |  |  |  |  |  |
| Paulownia | 0.3608 |  |  |  |  |  |  |  | P |  |  |  |  |
| Tamarix | 0.2192 |  |  |  |  |  |  |  | P |  |  |  |  |
| Styphnolobium | 0.1263 | P |  |  |  |  |  |  |  |  |  |  |  |
| Cinnamomum | 0.1022 |  |  |  |  |  | P |  |  |  |  |  |  |
| Zelkova | 0.0947 |  |  |  |  |  | P |  |  |  |  |  |  |
| Cryptomeria | 0.0787 |  |  | P |  |  |  |  |  |  |  |  |  |
| Chamaecyparis | 0.0643 |  |  | P |  |  |  |  |  |  |  |  |  |
| Fagus | 0.0052 |  |  |  | P |  |  |  |  |  |  |  |  |
| Acacia | 0.0046 |  |  |  |  | P |  | P |  |  |  | P | P |
| Ziziphus | 0.0010 |  |  |  |  |  |  |  |  |  |  | P |  |
| Camelia | 0.0993 |  |  |  |  |  | P |  |  |  |  |  |  |
| Balanites | NA |  |  |  |  |  |  |  |  |  |  | P |  |
| Cocos | NA |  |  |  |  |  |  |  |  | P |  |  |  |
| Cupressus | NA |  |  |  |  | P |  |  |  |  |  |  |  |
| Dipterocarpus | NA |  |  |  |  |  |  |  |  | P |  |  |  |
| Eucalyptus | NA |  |  |  |  |  |  | P | P |  |  |  |  |
| Hevea | NA |  |  |  |  |  |  |  |  | P |  |  |  |
| Picea | NA |  |  |  |  |  |  |  |  |  | P |  | P |
| Pinus | NA |  | P |  | P | P | P |  | P |  | P |  | P |
| Pseudotsuga | NA |  |  |  | P |  |  |  |  |  |  |  |  |
| Shorea | NA |  |  |  |  |  |  |  |  |  |  |  | P |
| Tectona | NA |  |  |  |  |  |  | P |  |  |  |  | P |
| sum AC | | 1.8234 | 5.6787 | 0.14295523 | 1.6743 | 0.7635 | 2.1286 | 0.0046 | 3.6470 | 0 | 1.6857 | 0.0056 | 0.0046 |
| Weighted Spatial Correlation Index | | 0.8027 | 0.8240 | 0.0722 | 0.8388 | 0.7544 | 0.5698 | 0.0046 | 0.7034 | 0.0000 | 0.8512 | 0.0039 | 0.0046 |
| Host Tree Species Proportion | | 1.0000 | 0.8750 | 1.0000 | 0.6000 | 0.5000 | 0.7143 | 0.3333 | 0.7500 | 0.0000 | 0.5000 | 0.6667 | 0.2000 |
| Area Adjustment Factor | | 0.0043 | 0.0375 | 0.0693 | 0.0200 | 0.0040 | 0.0165 | 0.3993 | 0.7033 | 0.0273 | 0.0267 | 0.0267 | 1.0000 |
| Comprehensive Threat Index (CTI) | | 0.0035 | 0.0271 | 0.0050 | 0.0101 | 0.0015 | 0.0067 | 0.0006 | 0.3710 | 0.0000 | 0.0113 | 0.0001 | 0.0009 |
